# Supplementary material for: Organic matter concentration and characteristic dynamics in surface waters post-bushfires and cyclones: fDOM sensors for environmental monitoring and control
Source: Royal Society of Chemistry journal article supplement (doi:10.1039/d4va00036f), 2024-01-01
Supplement: d4va00036f1.pdf [file d4va00036f1.pdf]

# Supplementary Information

## Organic matter concentration and characteristic dynamics in surface waters post-bushfires and cyclone: fDOM sensor for environmental monitoring and control

Huia Daraei<sup>a,b,c,\*</sup>, Edoardo Bertone<sup>b,c,d</sup>, Rodney A. Stewart<sup>b,c</sup>, John Awad<sup>a,c</sup>, Adam Leavesley<sup>f</sup>, Matthew Gale<sup>g</sup>, Eriita Jones<sup>a,h</sup>, Kathy Cinque<sup>i</sup>, Mark Agnew<sup>j</sup>, Hugh A. Burger<sup>a</sup>, John Van Leeuwen<sup>a</sup>

- a. Sustainable Infrastructure and Resource Management (SIRM), UniSA STEM, University of South Australia, Mawson Lakes, South Australia, 5095, Australia
- b. Griffith School of Engineering and Built Environment, Griffith University, Parklands Drive, Southport, Queensland, 4222, Australia
- c. Cities Research Institute, Griffith University, Parklands Drive, Southport, Queensland, 4222, Australia
- d. Australian Rivers Institute, Griffith University, 170 Kessels Road, Nathan, Queensland, 4111, Australia
- e. CSIRO Environment, Waite Campus, Waite Rd., Urrbrae, South Australia, 5064, Australia
- f. Parks and Conservation Service, Environment, Planning and Sustainable Development Directorate, Australian Capital Territory (ACT), 2601 Australia
- g. Fenner School of Environment & Society, Australian National University, ACT, 2601, Australia
- h. School of Earth and Planetary Sciences, Curtin University, Perth, WA 6845, Australia
- i. Melbourne Water, LaTrobe Street, Docklands, Victoria 3008, Australia
- j. Kangaroo Island Landscape Board, 35 Dauncey St, Kingscote, South Australia, 5223, Australia

\*Corresponding author: Tel: +61-7-555-28574 E-mail: [H.Daraei@Griffith.edu.au](mailto:H.Daraei@Griffith.edu.au); Address: GT2 1.01, Griffith University – Gold Coast Campus, Southport, Queensland, 4215, Australia

Table A1 Number of samples collected from each site

| State | Site name           | Site code | No. of samples | Samples collection period | Extreme climate event    | Event date               |
|-------|---------------------|-----------|----------------|---------------------------|--------------------------|--------------------------|
| ACT   | Orroral River       | P01       | 25             | 2020/03/03 to 2021/11/03  | Canberra Bushfire        | 2020/01/27 to 2020/02/27 |
| QLD   | Leslie Harrison Dam | P03       | 3              | 2019/09/24 to 2020/12/10  | Cyclone Uesi, QLD        | 2020/02/04 to 2020/02/14 |
|       | Herring Lagoon      | P05       | 3              | 2020/02/28 to 2020/12/08  | Cyclone Uesi, QLD        | 2020/02/04 to 2020/02/14 |
| SA    | Middle River        | P11       | 20             | 2020/02/07 to 2021/10/26  | Kangaroo Island Bushfire | 2019/12/20 to 2020/02/06 |
|       |                     | Total     | 51             |                           |                          |                          |

Table A2 The indices extracted from HPSEC data in the case of two sites that experienced a cyclone and a bushfire

| Site                               | P05 site |        |                    |         |       |                    | P11 site |        |                    |         |         |                    |
|------------------------------------|----------|--------|--------------------|---------|-------|--------------------|----------|--------|--------------------|---------|---------|--------------------|
|                                    | UVA260   |        |                    | Fl-Hu   |       |                    | UVA260   |        |                    | Fl-Hu   |         |                    |
|                                    | 01       | 03     | Ratio <sup>1</sup> | 01      | 03    | Ratio <sup>1</sup> | 01       | 03     | Ratio <sup>1</sup> | 01      | 03      | Ratio <sup>1</sup> |
| <b>WAMW<sup>2</sup> (kDa)</b>      | 3.21     | 2.31   | 1.4                | 1.88    | 1.73  | 1.1                | 2.05     | 2.58   | 0.8                | 1.12    | 1.49    | 0.8                |
| <b>LMW<sup>3</sup></b>             | 0.045    | 0.002  | 21.1               | 21.84   | 4.81  | 4.5                | 0.05     | 0.02   | 2.6                | 207.53  | 62.05   | 3.3                |
| <b>Building_blocks<sup>4</sup></b> | 0.100    | 0.008  | 12.5               | 70.48   | 12.33 | 5.7                | 0.16     | 0.06   | 2.7                | 501.03  | 164.81  | 3.0                |
| <b>Humics<sup>5</sup></b>          | 1.82     | 0.06   | 29.9               | 906.99  | 41.64 | 21.8               | 1.99     | 1.08   | 1.8                | 1989.84 | 1107.05 | 1.8                |
| <b>Biopolymers<sup>6</sup></b>     | 0.08     | 0.01   | 14.1               | 4.35    | 5.25  | 0.8                | 0.05     | 0.07   | 0.7                | 7.08    | 5.31    | 1.3                |
| <b>full_DOM_range<sup>7</sup></b>  | 2.17     | 0.08   | 27.7               | 1005.46 | 65.79 | 15.3               | 2.26     | 1.24   | 1.8                | 2706.73 | 1339.94 | 2.0                |
| <b>PP-P1<sup>8</sup></b>           | 0.0944   | 0.0064 | 14.8               | 55.3    | 9.7   | 5.7                | 0.1524   | 0.0537 | 2.8                | 432     | 140     | 3.1                |
| <b>PP-P2</b>                       | 0.1174   | 0.0099 | 11.8               | 36.2    | 5.1   | 7.1                | 0.2177   | 0.0859 | 2.5                | 197     | 61.1    | 3.2                |
| <b>PP-P3</b>                       | 0.2435   | 0.0115 | 21.2               | 119     | 11    | 10.5               | 0.3830   | 0.1841 | 2.1                | 527     | 201     | 2.6                |
| <b>PP-P4</b>                       | 0.5160   | 0.0173 | 29.8               | 258     | 10    | 24.7               | 0.6100   | 0.3689 | 1.7                | 675     | 351     | 1.9                |
| <b>PP-P5</b>                       | 0.5340   | 0.0173 | 30.8               | 451     | 15    | 30.1               | 0.5899   | 0.3401 | 1.7                | 604.66  | 483.3   | 1.3                |
| <b>PP-P6</b>                       | 0.3464   | 0.0050 | 69.8               | 41      | 1.7   | 24.2               | 0.1696   | 0.0933 | 1.8                | 41.91   | 30.73   | 1.4                |

| Site       | P05 site |        |                    |       |      |                    | P11 site |        |                    |       |      |                    |
|------------|----------|--------|--------------------|-------|------|--------------------|----------|--------|--------------------|-------|------|--------------------|
|            | UVA260   |        |                    | Fl-Hu |      |                    | UVA260   |        |                    | Fl-Hu |      |                    |
| Parameters | 01       | 03     | Ratio <sup>1</sup> | 01    | 03   | Ratio <sup>1</sup> | 01       | 03     | Ratio <sup>1</sup> | 01    | 03   | Ratio <sup>1</sup> |
| PP-P7      | 0.0300   | 0.0014 | 21.3               | 0.56  | 1.05 | 0.5                | 0.0351   | 0.0406 | 0.9                | 1.25  | 1.06 | 1.2                |

<sup>1</sup>Ratio of the WAMW (kDa) values of impacted samples to control samples in each studied site

$${}^2WAMW = \frac{\sum UVA260 \times MW}{\sum UVA260}$$

<sup>3</sup>Low molecular range weight (0.1 to 0.3 kDa)

<sup>4</sup>(0.3 to 1 kDa)

<sup>5</sup>(1 to 10 kDa)

<sup>6</sup>(20 to 100 kDa)

<sup>7</sup>(0.100 to 100 kDa)

<sup>8</sup>Peak 1: The decomposed (identified) MW peak (component) area in the studied samples AMW profile using the peak fitting approach

Table A3 Coefficient of variation (CV) values determined using triplication of the selected sample's analyses

| Water quality index       | Myponga River |       |       |              |              |            | Murray River |       |       |              |              |             |
|---------------------------|---------------|-------|-------|--------------|--------------|------------|--------------|-------|-------|--------------|--------------|-------------|
|                           | S-1           | S-2   | S-3   | Mean         | SD           | CV         | S-1          | S-2   | S-3   | Mean         | SD           | CV          |
| A <sub>254</sub>          | 1.026         | 1.044 | 1.036 | <b>1.035</b> | <b>0.007</b> | <b>0.7</b> | 0.221        | 0.224 | 0.214 | <b>0.220</b> | <b>0.004</b> | <b>1.9</b>  |
| True colour (HU)          | 189           | 204   | 206   | <b>199.7</b> | <b>7.65</b>  | <b>3.8</b> | 45           | 53    | 40    | <b>46.0</b>  | <b>5.55</b>  | <b>12.1</b> |
| TOC (mg L <sup>-1</sup> ) | 23.1          | 24.2  | 24.4  | <b>23.9</b>  | <b>0.7</b>   | <b>2.9</b> | 8.74         | 8.05  | 8.32  | <b>8.4</b>   | <b>0.3</b>   | <b>4.2</b>  |
| DOC (mg L <sup>-1</sup> ) | 22.3          | 20.5  | 20.9  | <b>21.2</b>  | <b>0.9</b>   | <b>4.5</b> | 6.21         | 6.32  | 6.5   | <b>6.3</b>   | <b>0.1</b>   | <b>2.3</b>  |
| Turbidity (NTU)           | 8.8           | 8.6   | 8.6   | <b>8.7</b>   | <b>0.1</b>   | <b>1.1</b> | 86.7         | 87.8  | 86.6  | <b>87.0</b>  | <b>0.5</b>   | <b>0.6</b>  |
| pH                        | 6.89          | 7.17  | 7.24  | <b>7.10</b>  | <b>0.15</b>  | <b>2.1</b> | 7.36         | 7.38  | 7.40  | <b>7.38</b>  | <b>0.02</b>  | <b>0.2</b>  |

S: samples

Table A4 The correlation coefficients ( $r$ ) between fDOM<sub>s</sub> and DOC, A<sub>254</sub> (as benchmark) and colour as well as A<sub>254</sub> and DOC and colour.

| Site                      | N  | fDOM <sub>s</sub> |                  |        | fDOM <sub>s,III</sub> |                  |        | fDOM <sub>s,IV</sub> |                  |        | A <sub>254</sub> |        |
|---------------------------|----|-------------------|------------------|--------|-----------------------|------------------|--------|----------------------|------------------|--------|------------------|--------|
|                           |    | DOC               | A <sub>254</sub> | Colour | DOC                   | A <sub>254</sub> | Colour | DOC                  | A <sub>254</sub> | Colour | DOC              | Colour |
| Orroral River (P01)       | 22 | .978**            | .980**           | .812** | .983**                | .985**           | .822** | .987**               | .999**           | .827** | .995**           | .907** |
| Middle River (P11)        | 17 | .700**            | .683**           | .024   | .920**                | .884**           | .372   | .952**               | .957**           | .620** | .954**           | .791** |
| Leslie Harrison Dam (P03) | 3  | .997*             | .996             | .982   | .983                  | >.999*           | .996   | .953                 | .989             | .999*  | .987             | .994   |
| Herring Lagoon (P05)      | 3  | .978              | .971             | .962   | .967                  | .959             | .948   | >.999**              | .999*            | .999*  | .999*            | .999*  |

\*Correlation is significant at the .05 level (2-tailed).

\*\*Correlation is significant at the .01 level (2-tailed).

Table A5 The results of the elemental analysis of the samples

| Element                    | P01_01  | P11_01  | P05_01  | P03_02  | Element                        | P01_01   | P11_01   | P05_01   | P03_02   |
|----------------------------|---------|---------|---------|---------|--------------------------------|----------|----------|----------|----------|
| <b>Zinc - Total</b>        | 0.0006  | 0.002   | 0.0018  | 0.0126  | <b>Lithium - Total</b>         | 0.0008   | 0.0069   | 0.0008   | 0.0016   |
| <b>Zinc - Soluble</b>      | 0.0003< | 0.0005  | 0.0015  | 0.01    | <b>Lithium - Soluble</b>       | 0.0009   | 0.0053   | 0.0008   | 0.0009   |
| <b>Vanadium - Total</b>    | 0.001   | 0.0032  | 0.0001  | 0.0045  | <b>Lanthanum - Total</b>       | 0.0002   | 0.0011   | 0.0001<  | 0.0023   |
| <b>Vanadium - Soluble</b>  | 0.0006  | 0.0011  | 0.0001  | 0.0004  | <b>Lanthanum - Soluble</b>     | 0.0001<  | 0.0003   | 0.0001<  | 0.0008   |
| <b>Uranium - Total</b>     | 0.0015  | 0.0004  | 0.0001< | 0.0002  | <b>Potassium</b>               | 6.86     | 17.6     | 1.08     | 2.99     |
| <b>Uranium - Soluble</b>   | 0.0014  | 0.0003  | 0.0001< | 0.0001< | <b>Mercury - Total</b>         | 0.00003< | 0.00006  | 0.00006  | 0.00003< |
| <b>Thallium - Total</b>    | 0.0001< | 0.0001< | 0.0001< | 0.0001< | <b>Mercury - Soluble</b>       | 0.00003< | 0.00003< | 0.00003< | 0.00003< |
| <b>Thallium - Soluble</b>  | 0.0001< | 0.0001< | 0.0001< | 0.0001< | <b>Iron - Total</b>            | 0.5347   | 1.533    | 0.9343   | 3.141    |
| <b>Titanium - Total</b>    | 0.003   | 0.0286  | 0.0011  | 0.0655  | <b>Iron - Soluble</b>          | 0.1213   | 0.412    | 0.7194   | 0.2537   |
| <b>Titanium - Soluble</b>  | 0.0005  | 0.0011  | 0.0008  | 0.0038  | <b>Copper - Total</b>          | 0.0003   | 0.0027   | 0.0004   | 0.0573   |
| <b>Strontium - Total</b>   | 0.2121  | 0.3138  | 0.0182  | 0.0414  | <b>Copper - Soluble</b>        | 0.0002   | 0.0016   | 0.0003   | 0.0366   |
| <b>Strontium - Soluble</b> | 0.2194  | 0.258   | 0.0163  | 0.0366  | <b>Chromium (VI)</b>           | 0.01<    | 0.01<    | 0.01<    | 0.01     |
| <b>Tin - Total</b>         | 0.0005< | 0.0005< | 0.0005< | 0.0005< | <b>Chromium (VI) - Soluble</b> | 0.0002<  | 0.0011<  | 0.0004<  | 0.0019   |

| Element                     | P01_01  | P11_01  | P05_01  | P03_02  | Element                    | P01_01  | P11_01  | P05_01  | P03_02 |
|-----------------------------|---------|---------|---------|---------|----------------------------|---------|---------|---------|--------|
| <b>Tin - Soluble</b>        | 0.0005< | 0.0005< | 0.0005< | 0.0005< | <b>Chromium - Total</b>    | 0.0002  | 0.0011  | 0.0004  | 0.0019 |
| <b>Selenium - Total</b>     | 0.0001< | 0.0009  | 0.0001  | 0.0006  | <b>Chromium - Soluble</b>  | 0.0001< | 0.0003  | 0.0003  | 0.0006 |
| <b>Selenium - Soluble</b>   | 0.0001< | 0.0005  | 0.0001< | 0.0003  | <b>Cobalt - Total</b>      | 0.0005  | 0.0017  | 0.0002  | 0.0042 |
| <b>Antimony - Total</b>     | 0.0005< | 0.0009  | 0.0011  | 0.0016  | <b>Cobalt - Soluble</b>    | 0.0003  | 0.0009  | 0.0002  | 0.0001 |
| <b>Antimony - Soluble</b>   | 0.0005< | 0.0005< | 0.0006  | 0.0008  | <b>Cadmium - Total</b>     | 0.0001< | 0.0001< | 0.0001< | 0.0001 |
| <b>Lead - Total</b>         | 0.0001< | 0.0006  | 0.0001  | 0.0059  | <b>Cadmium - Soluble</b>   | 0.0001< | 0.0001< | 0.0001< | 0.0001 |
| <b>Lead - Soluble</b>       | 0.0001< | 0.0001< | 0.0001< | 0.0001< | <b>Calcium</b>             | 39.6    | 34.3    | 1.6     | 4.1    |
| <b>Phosphorus - Total</b>   | 0.083   | 0.257   | 0.028   | 0.131   | <b>Beryllium - Total</b>   | 0.0003< | 0.0003< | 0.0003< | 0.0003 |
| <b>Phosphorus - Soluble</b> | 0.029   | 0.067   | 0.005<  | 0.006   | <b>Beryllium - Soluble</b> | 0.0003< | 0.0003< | 0.0003< | 0.0003 |
| <b>Nickel - Total</b>       | 0.0009  | 0.0023  | 0.0002  | 0.0029  | <b>Barium - Total</b>      | 0.0514  | 0.0561  | 0.0071  | 0.0483 |



Table A4 (continued)

| <b>Element</b>              | <b>P01_01</b> | <b>P11_01</b> | <b>P05_01</b> | <b>P03_02</b> | <b>Element</b>             | <b>P01_01</b> | <b>P11_01</b> | <b>P05_01</b> | <b>P03_02</b> |
|-----------------------------|---------------|---------------|---------------|---------------|----------------------------|---------------|---------------|---------------|---------------|
| <b>Nickel - Soluble</b>     | 0.0008        | 0.0015        | 0.0001        | 0.0016        | <b>Barium - Soluble</b>    | 0.0503        | 0.0418        | 0.0065        | 0.0399        |
| <b>Sodium</b>               | 13.8          | 137           | 16.3          | 18.8          | <b>Boron - Soluble</b>     | 0.02<         | 0.125         | 0.02<         | 0.031         |
| <b>Molybdenum - Total</b>   | 0.0011        | 0.0013        | 0.0001<       | 0.0003        | <b>Arsenic - Total</b>     | 0.0006        | 0.0021        | 0.0005        | 0.0028        |
| <b>Molybdenum - Soluble</b> | 0.0011        | 0.001         | 0.0001<       | 0.0001        | <b>Arsenic - Soluble</b>   | 0.0006        | 0.0014        | 0.0005        | 0.0008        |
| <b>Manganese - Total</b>    | 0.2044        | 0.1188        | 0.0282        | 1.094         | <b>Aluminium - Total</b>   | 0.053         | 0.714         | 0.086         | 2.567         |
| <b>Manganese - Soluble</b>  | 0.0031        | 0.0037        | 0.0255        | 0.0246        | <b>Aluminium - Soluble</b> | 0.007         | 0.046         | 0.067         | 0.223         |
| <b>Magnesium</b>            | 10.8          | 32.9          | 2.37          | 3.28          | <b>Silver - Total</b>      | 0.00003<      | 0.00003<      | 0.00003<      | 0.00004       |
|                             |               |               |               |               | <b>Silver - Soluble</b>    | 0.00003<      | 0.00003<      | 0.00003<      | 0.00003       |

Table A5 The indices extracted from fEEM in the case of two sites that experienced cyclone and bushfire

| Site                | P05   |       |       | P11  |      |      |      |      |      |      |      |      |      |      |      |      |
|---------------------|-------|-------|-------|------|------|------|------|------|------|------|------|------|------|------|------|------|
| Sample              | 01    | 02    | 03    | 01   | 02   | 03   | 04   | 07   | 09   | 14   | 15   | 16   | 17   | 18   | 19   | 20   |
| P1*                 | 2.02  | 15.60 | 11.70 | 1.57 | 2.31 | 2.17 | 1.87 | 1.12 | 1.40 | 2.24 | 2.03 | 2.26 | 2.13 | 2.42 | 1.73 | 1.97 |
| P2                  | 6.37  | 21.06 | 16.41 | 18.5 | 16.2 | 14.6 | 14.4 | 14.4 | 13.3 | 14.2 | 15.5 | 15.7 | 14.1 | 14.3 | 12.5 | 13.6 |
| FA                  | 54.67 | 37.17 | 43.04 | 50.3 | 51.4 | 51.4 | 51.1 | 54.6 | 53.0 | 54.7 | 56.6 | 52.0 | 53.8 | 51.5 | 54.2 | 53.2 |
| SMP                 | 4.55  | 10.33 | 10.53 | 7.8  | 7.5  | 7.8  | 7.7  | 5.9  | 6.5  | 6.9  | 6.2  | 7.7  | 7.2  | 7.2  | 6.1  | 7.0  |
| HA                  | 32.39 | 15.84 | 18.32 | 21.8 | 22.6 | 24.1 | 24.9 | 24.0 | 25.7 | 22.0 | 19.8 | 22.4 | 22.8 | 24.7 | 25.5 | 24.2 |
| HIX <sup>2</sup>    | 0.98  | 0.86  | 0.85  | 0.95 | 0.95 | 0.95 | 0.95 | 0.97 | 0.96 | 0.95 | 0.96 | 0.94 | 0.95 | 0.96 | 0.96 | 0.96 |
| BIX <sup>3</sup>    | 0.30  | 0.42  | 0.48  | 0.76 | 0.64 | 0.62 | 0.59 | 0.58 | 0.56 | 0.51 | 0.55 | 0.58 | 0.54 | 0.53 | 0.47 | 0.50 |
| Peak T <sup>4</sup> | 0.03  | 0.24  | 0.04  | 0.60 | 0.40 | 0.33 | 0.25 | 0.16 | 0.17 | 0.21 | 0.23 | 0.32 | 0.24 | 0.17 | 0.13 | 0.15 |
| Peak A <sup>5</sup> | 1.31  | 0.74  | 0.23  | 4.92 | 4.17 | 3.31 | 2.62 | 2.61 | 2.49 | 2.47 | 2.87 | 3.10 | 2.48 | 1.86 | 1.97 | 1.83 |
| Peak M <sup>6</sup> | 0.67  | 0.38  | 0.11  | 4.32 | 3.21 | 2.35 | 1.86 | 1.63 | 1.63 | 1.39 | 1.66 | 1.99 | 1.55 | 1.11 | 1.09 | 1.07 |
| Peak C <sup>7</sup> | 1.00  | 0.48  | 0.14  | 3.90 | 3.22 | 2.63 | 2.11 | 1.90 | 1.87 | 1.59 | 1.85 | 2.16 | 1.78 | 1.29 | 1.36 | 1.23 |
| A:T <sup>8</sup>    | 21.70 | 3.18  | 4.81  | 7.3  | 9.8  | 9.7  | 11.1 | 16.1 | 14.0 | 12.4 | 14.2 | 10.2 | 10.2 | 11.6 | 16.6 | 13.3 |
| C:A <sup>9</sup>    | 0.70  | 0.59  | 0.58  | 0.74 | 0.71 | 0.74 | 0.74 | 0.69 | 0.71 | 0.58 | 0.58 | 0.63 | 0.67 | 0.67 | 0.65 | 0.61 |
| C:M <sup>10</sup>   | 2.38  | 1.78  | 1.76  | 0.99 | 1.25 | 1.35 | 1.45 | 1.59 | 1.55 | 1.51 | 1.43 | 1.34 | 1.56 | 1.56 | 1.81 | 1.51 |
| C:T <sup>11</sup>   | 15.20 | 1.89  | 2.80  | 5.4  | 6.9  | 7.2  | 8.2  | 11.1 | 10.0 | 7.2  | 8.3  | 6.4  | 6.8  | 7.8  | 10.8 | 8.1  |

|                              |      |       |       |      |      |      |      |      |      |      |      |      |      |      |      |      |                                                                                                                                                                         |
|------------------------------|------|-------|-------|------|------|------|------|------|------|------|------|------|------|------|------|------|-------------------------------------------------------------------------------------------------------------------------------------------------------------------------|
| <b>NI<sup>12</sup></b>       | 1.48 | 1.00  | 1.00  | 5.8  | 4.9  | 3.8  | 3.1  | 3.0  | 2.9  | 2.9  | 3.4  | 3.6  | 2.9  | 2.2  | 2.3  | 2.1  | *Weighted average percentage values for P1, P2, FA, SMP and HA indices.                                                                                                 |
| <b>EXO_fDOM<sup>13</sup></b> | 2.02 | 15.60 | 11.70 | 2.2  | 1.8  | 1.4  | 1.1  | 1.2  | 1.1  | 0.9  | 1.1  | 1.2  | 1.1  | 0.8  | 0.9  | 0.7  |                                                                                                                                                                         |
| <b>PAR_P1<sup>14</sup></b>   | 0.47 | 1.90  | 1.51  | 4.70 | 3.91 | 3.00 | 2.46 | 2.21 | 2.22 | 1.82 | 2.12 | 2.50 | 2.06 | 1.49 | 1.49 | 1.38 | <sup>1</sup> Ratio of the fluorescence index value in the raw sample to a sample treated with $\geq$ EnD.                                                               |
| <b>PAR_P2</b>                | 0.20 | 1.21  | 0.61  | 1.80 | 1.45 | 1.17 | 0.87 | 1.18 | 0.96 | 0.81 | 0.95 | 1.04 | 0.98 | 0.73 | 0.92 | 0.69 |                                                                                                                                                                         |
| <b>PAR_P3</b>                | 0.21 | 0.41  | 0.49  | 2.61 | 1.60 | 1.12 | 0.85 | 0.72 | 0.66 | 0.49 | 0.63 | 0.87 | 0.64 | 0.43 | 0.38 | 0.37 | <sup>2</sup> Humification index (HIX <sub>250nm</sub> ): An indicator of humic substance content or extent of humification <sup>1</sup> ; <sup>3</sup> Biological index |
| <b>PAR_P4</b>                | 0.28 | 0.00  | 0.65  | 0.00 | 0.33 | 0.34 | 0.25 | 0.25 | 0.24 | 0.69 | 0.78 | 0.66 | 0.35 | 0.32 | 0.35 | 0.42 |                                                                                                                                                                         |
| <b>PAR_P5</b>                | 0.09 | 0.03  | 0.16  | 0.10 | 0.16 | 0.15 | 0.12 | 0.06 | 0.08 | 0.15 | 0.15 | 0.23 | 0.22 | 0.10 | 0.09 | 0.10 |                                                                                                                                                                         |

(BIX): An indicator of autotrophic productivity where  $>1$  values correspond to recently produced DOM of autochthonous origin <sup>2</sup>); <sup>4</sup>Peak T: An indicator of tryptophan like part of protein like compounds; <sup>5</sup>Peak A: An indicator of humic Like compounds.; <sup>6</sup>Peak M: An indicator of marine humic Like compounds; <sup>7</sup>Peak C: An indicator of Humic Like compounds <sup>3,8</sup>Peaks ratios (A:T): Indicator of the amount of humic-like (recalcitrant) vs. fresh-like (labile) fluorescence <sup>4</sup>); <sup>9</sup>Peaks ratio (C:A): An indication of the amount of humic-like vs. fulvic-like compounds; <sup>10</sup>Peaks ratio (C:M): An indication of the amount of diagenetically altered (blue-shifted) fluorescence in a sample <sup>5,6</sup>; <sup>11</sup>Peaks ratios (C:T): Indicator of the amount of humic-like (recalcitrant) vs. fresh-like (labile) fluorescence <sup>4</sup>); <sup>12</sup>New index: Proposed to be an indicator for humification; <sup>13</sup>EEM\_fDOM: Is the normalized signal collected from benchtop machine output EEM spectra at the same ex-em paired wavelength which the EXO\_fDOM sensor use.<sup>14</sup>Peak 1: The decomposed (identified) EEM peak (component) area in the studied samples EEM spectra using PARFAC approach.

Figure 2.a1

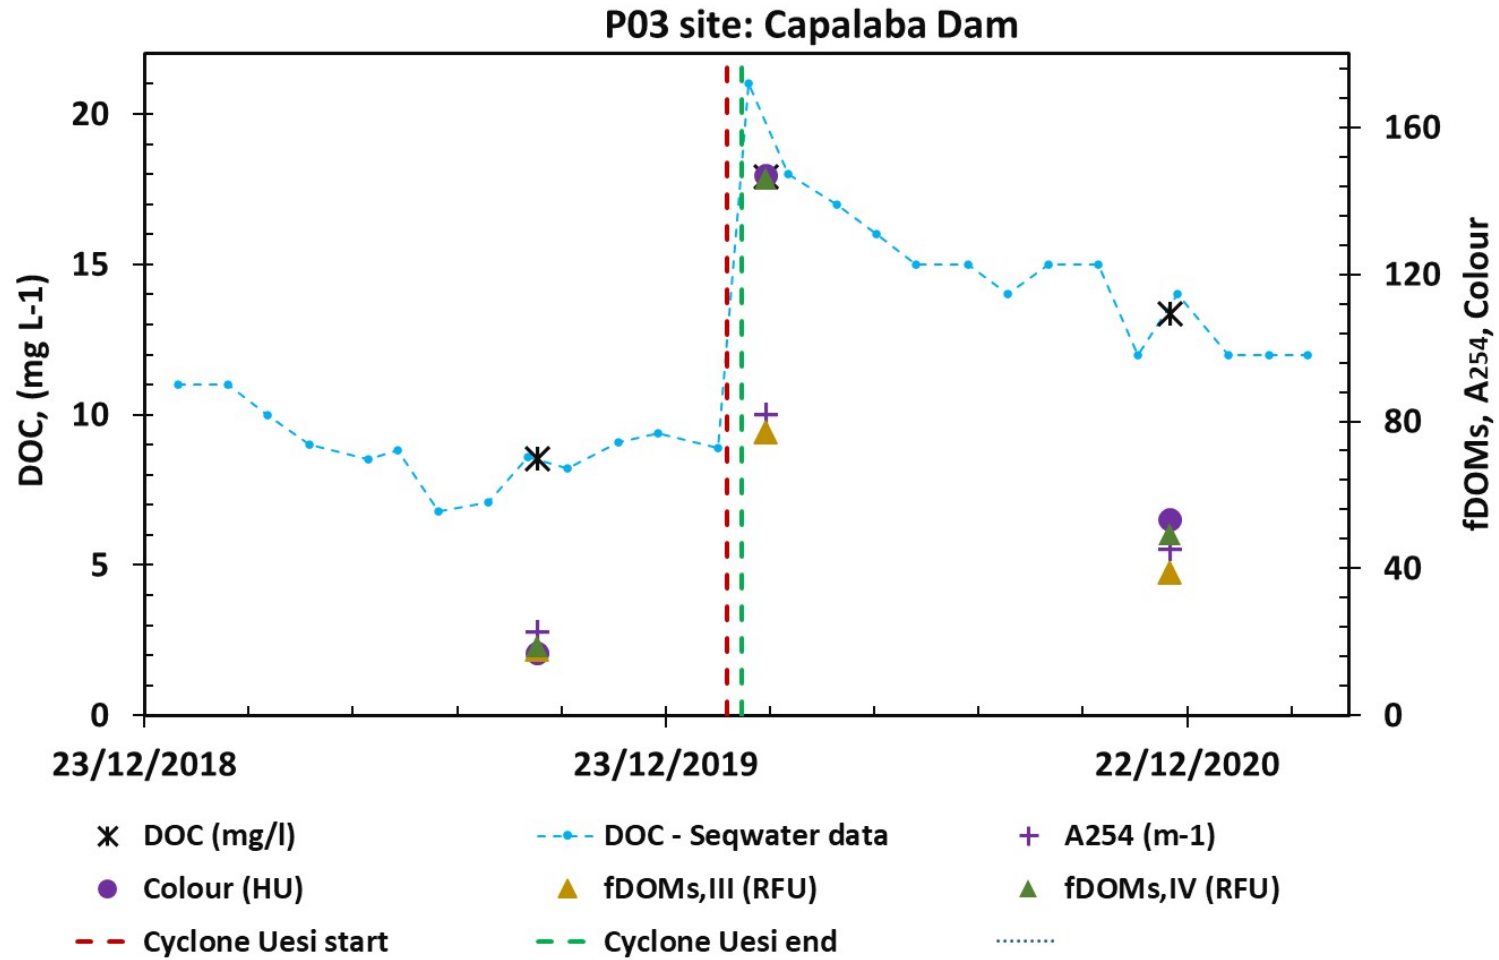

Figure 2.a2

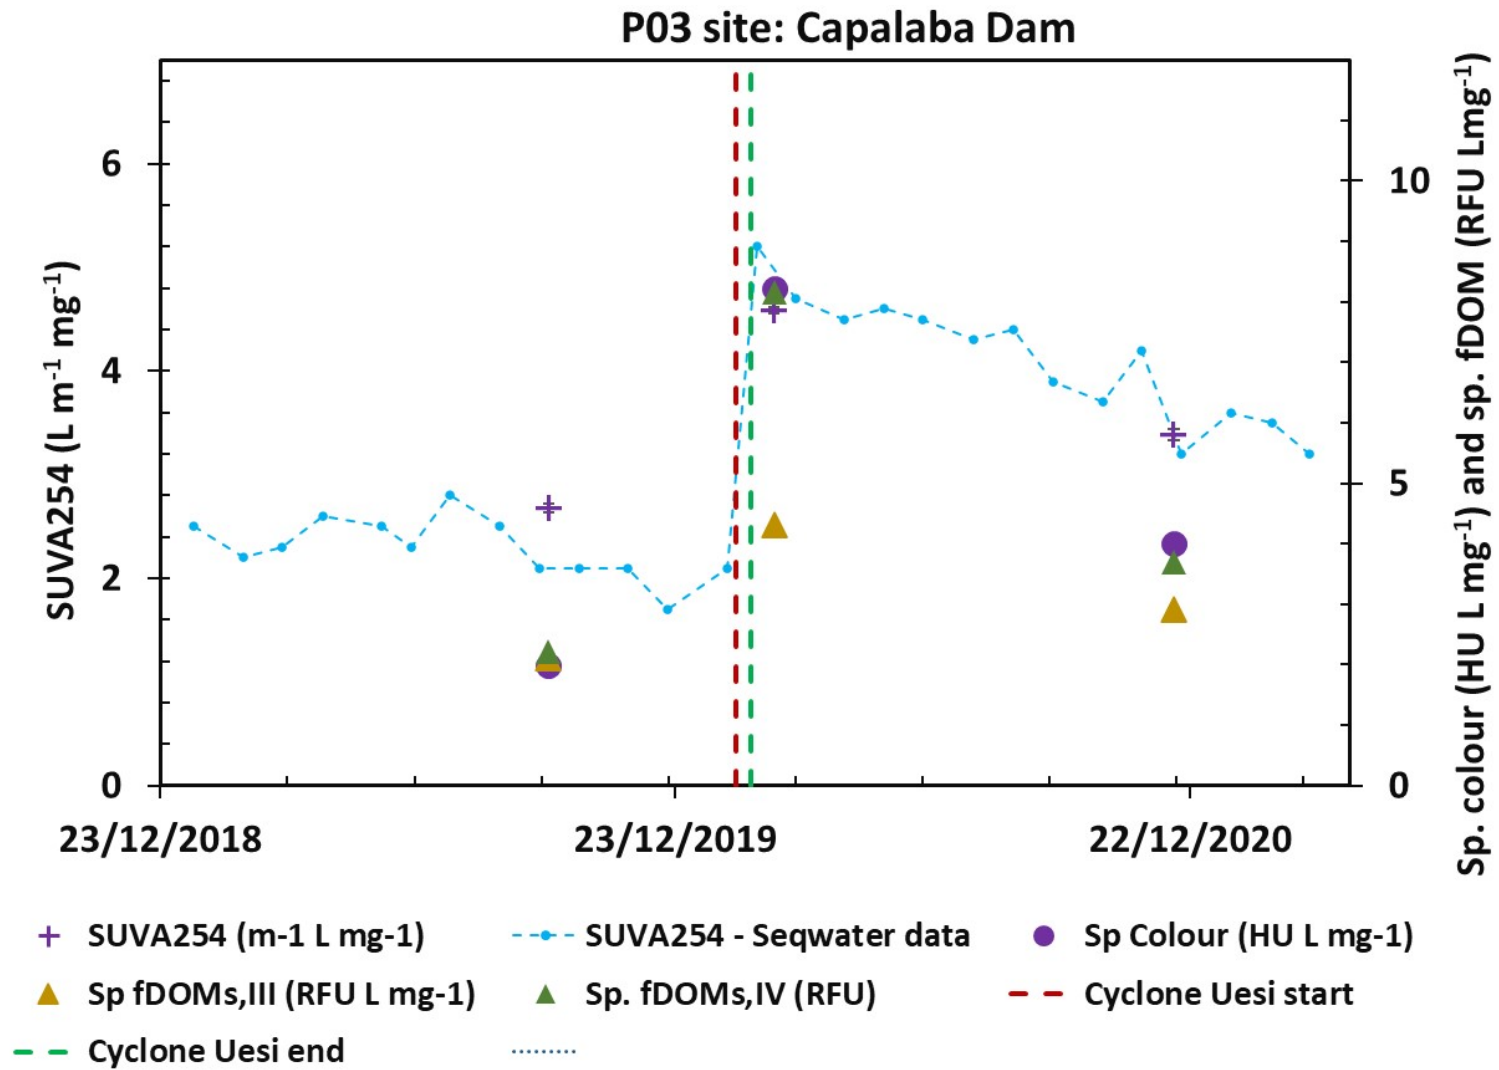

Figure 2.a3

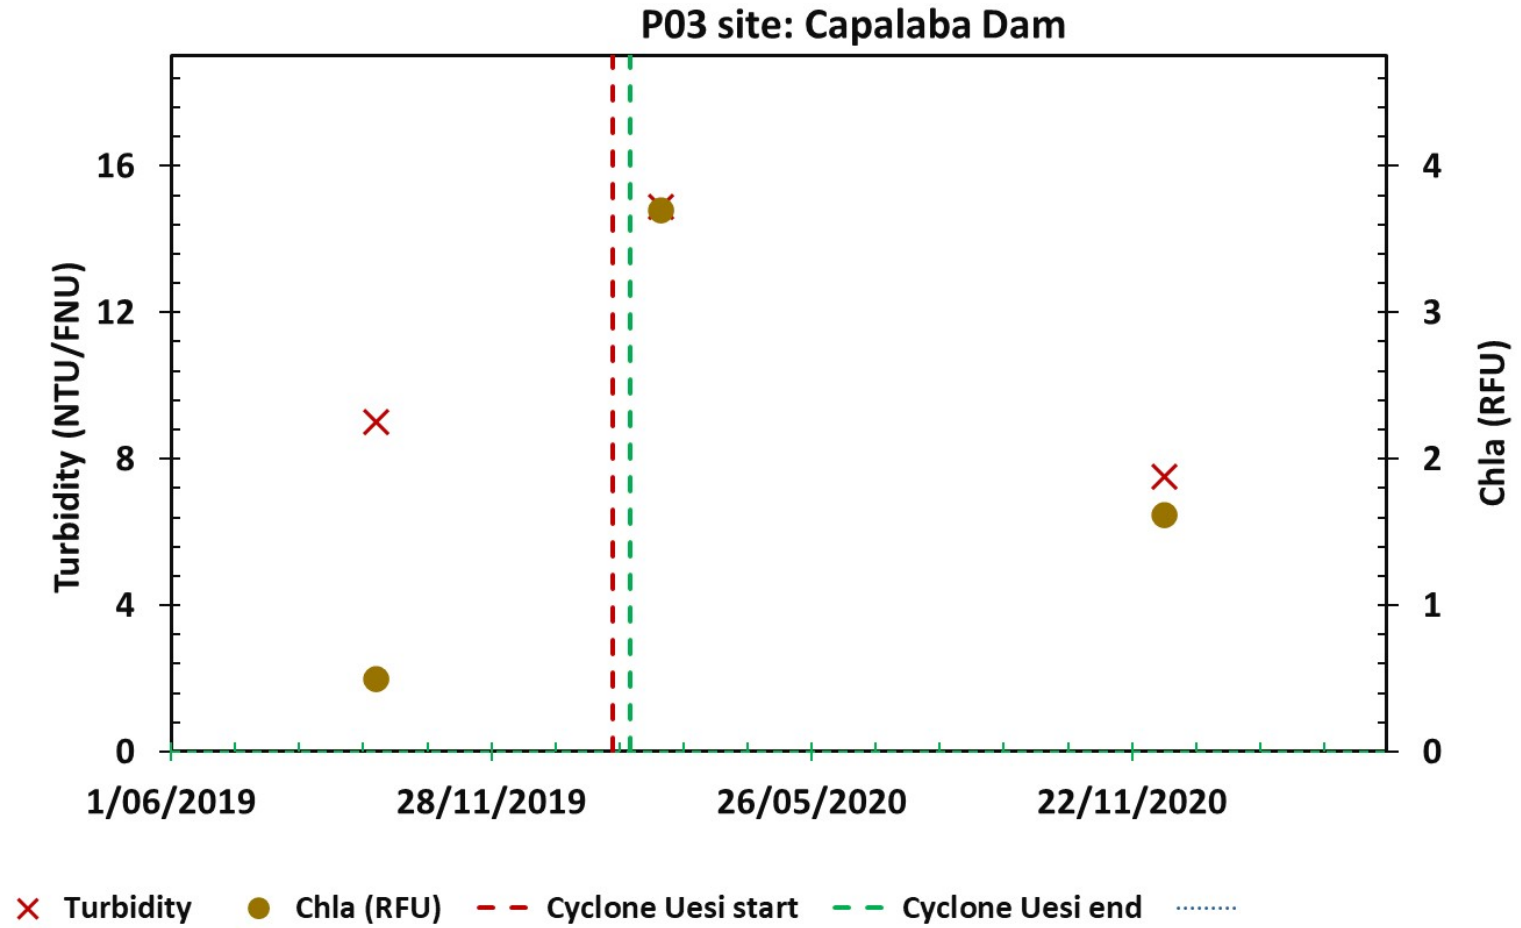

Figure 2.b1

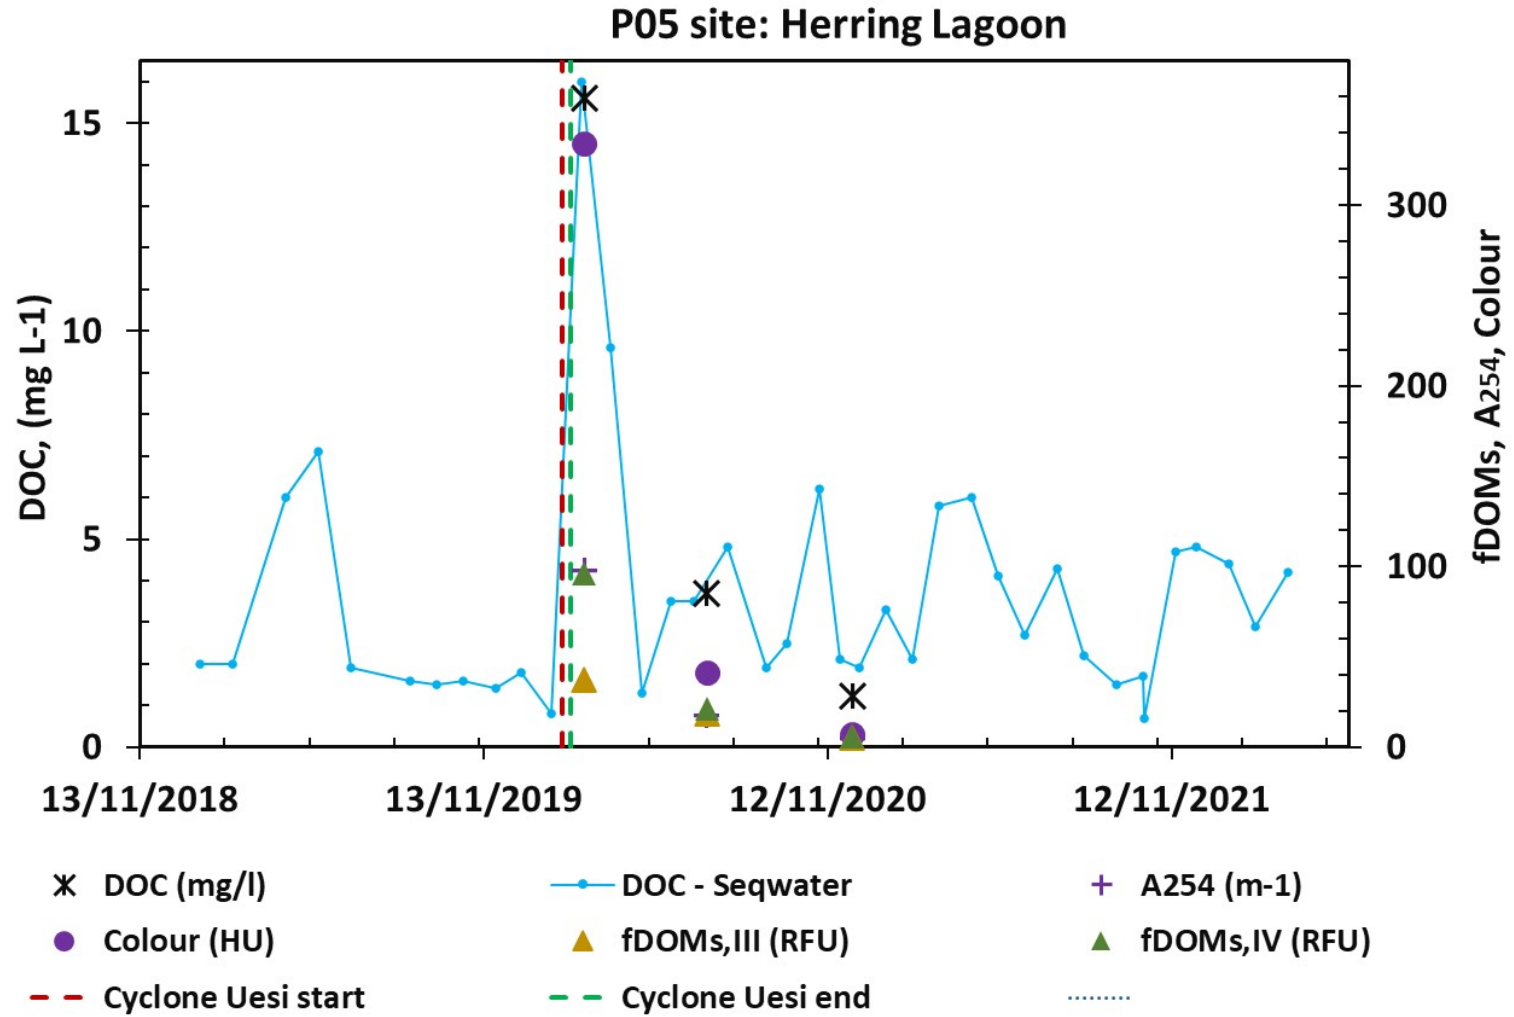

Figure 2.b2

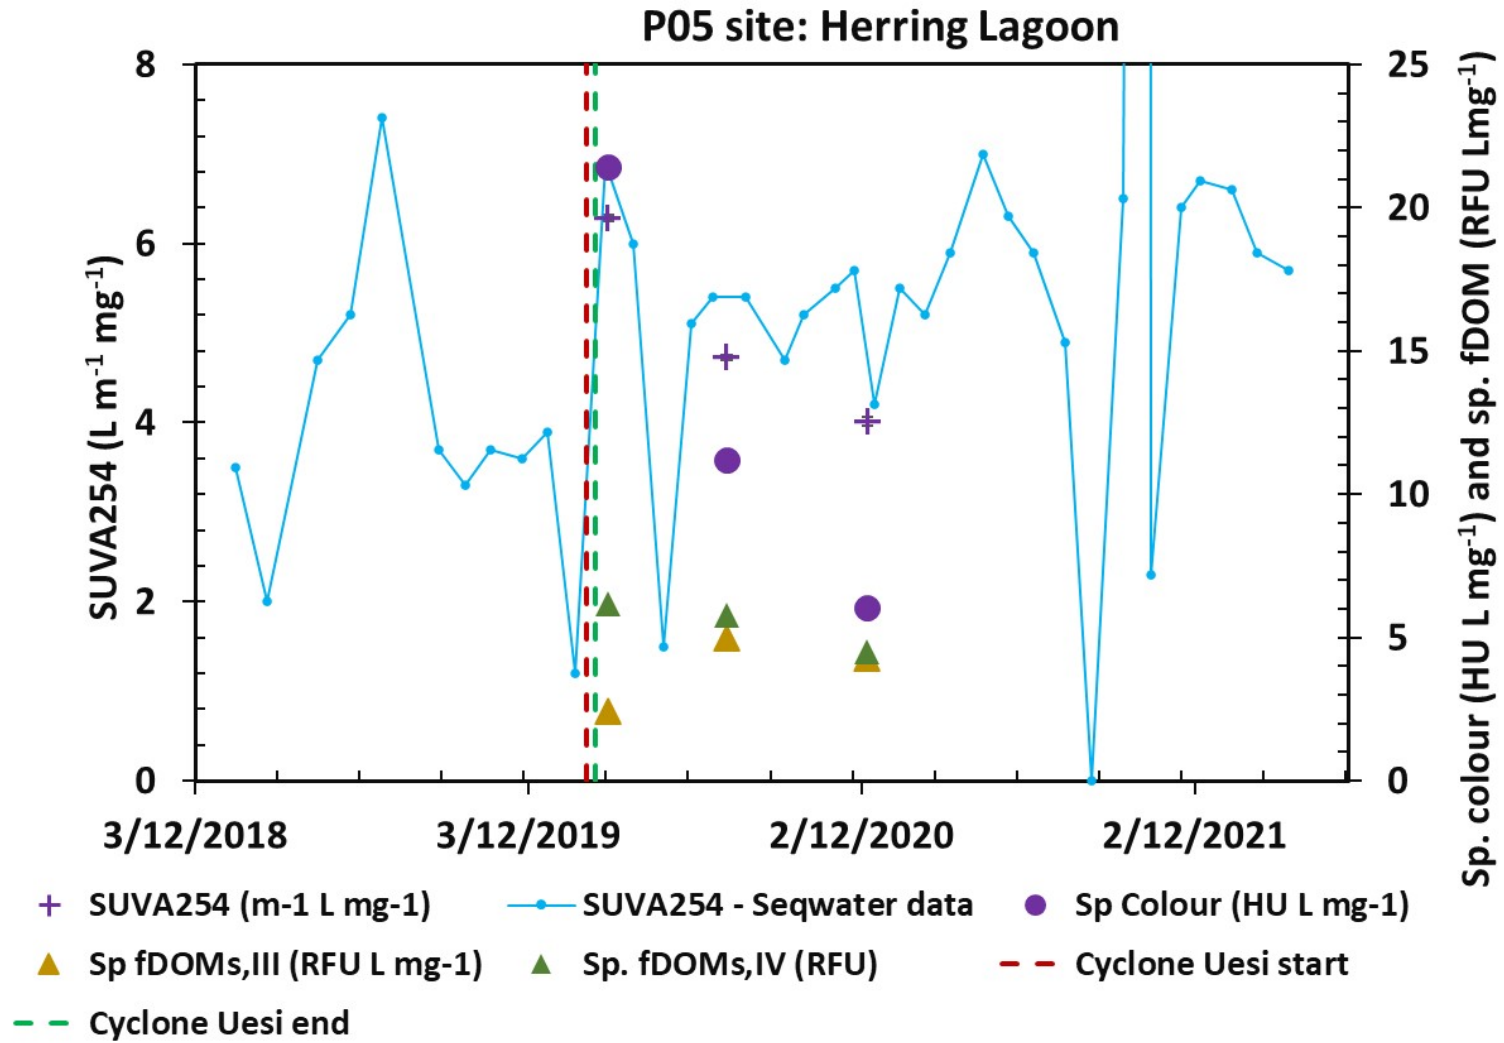



Figure 2.b3

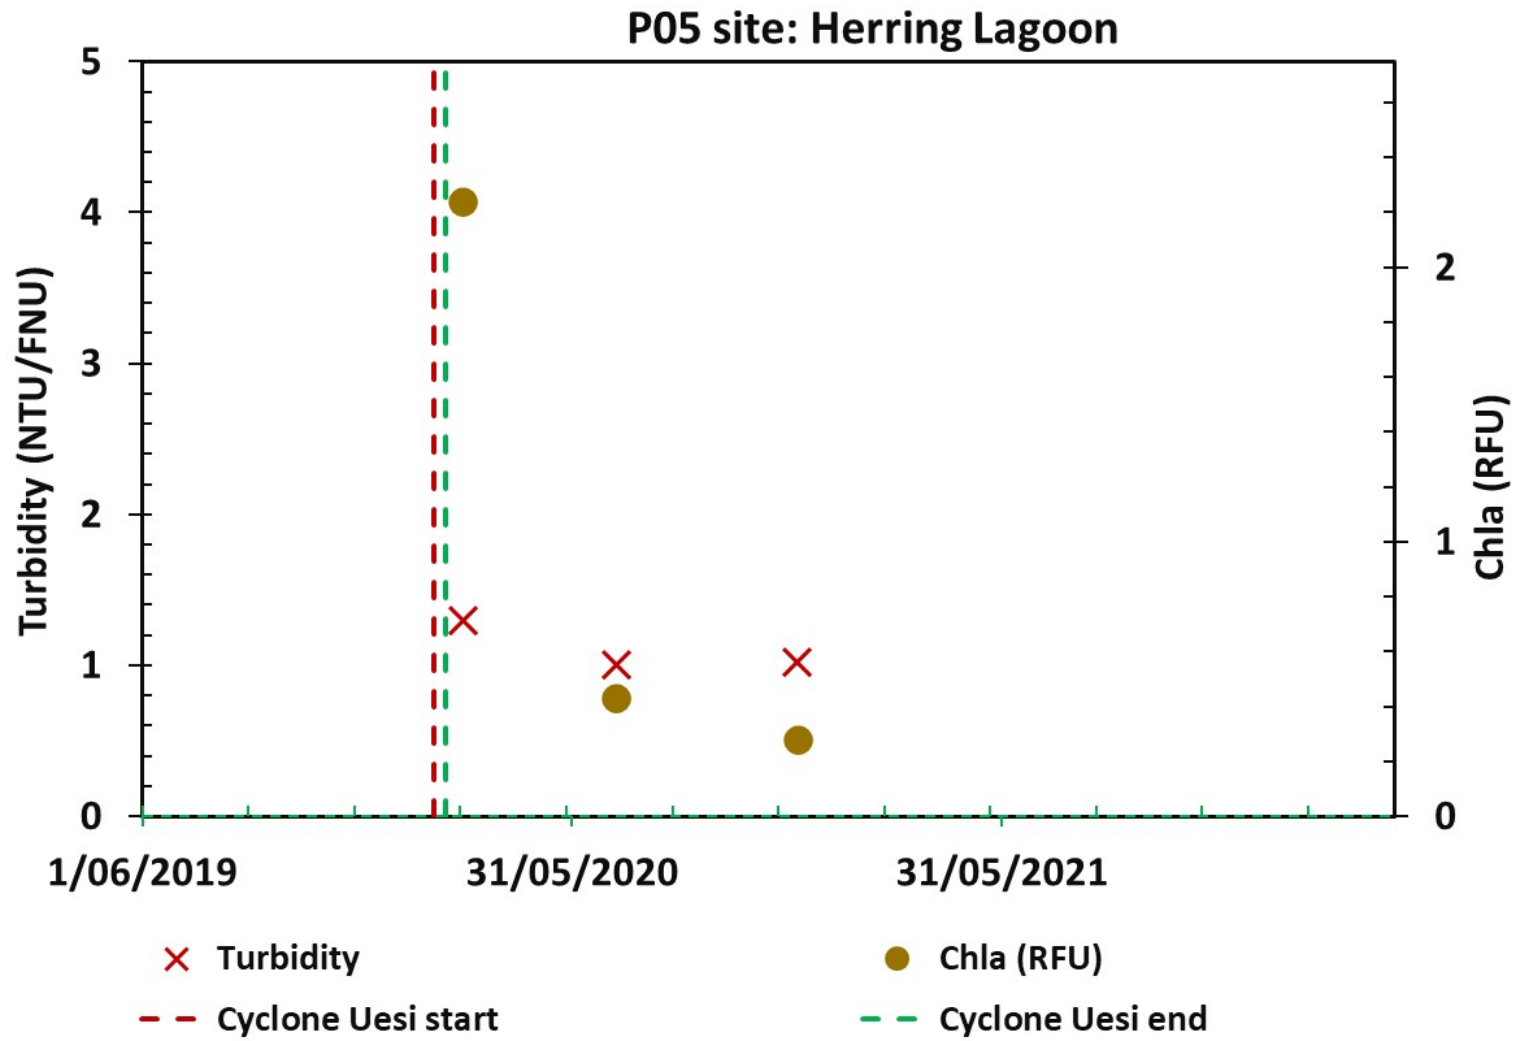

Figure 3.a1

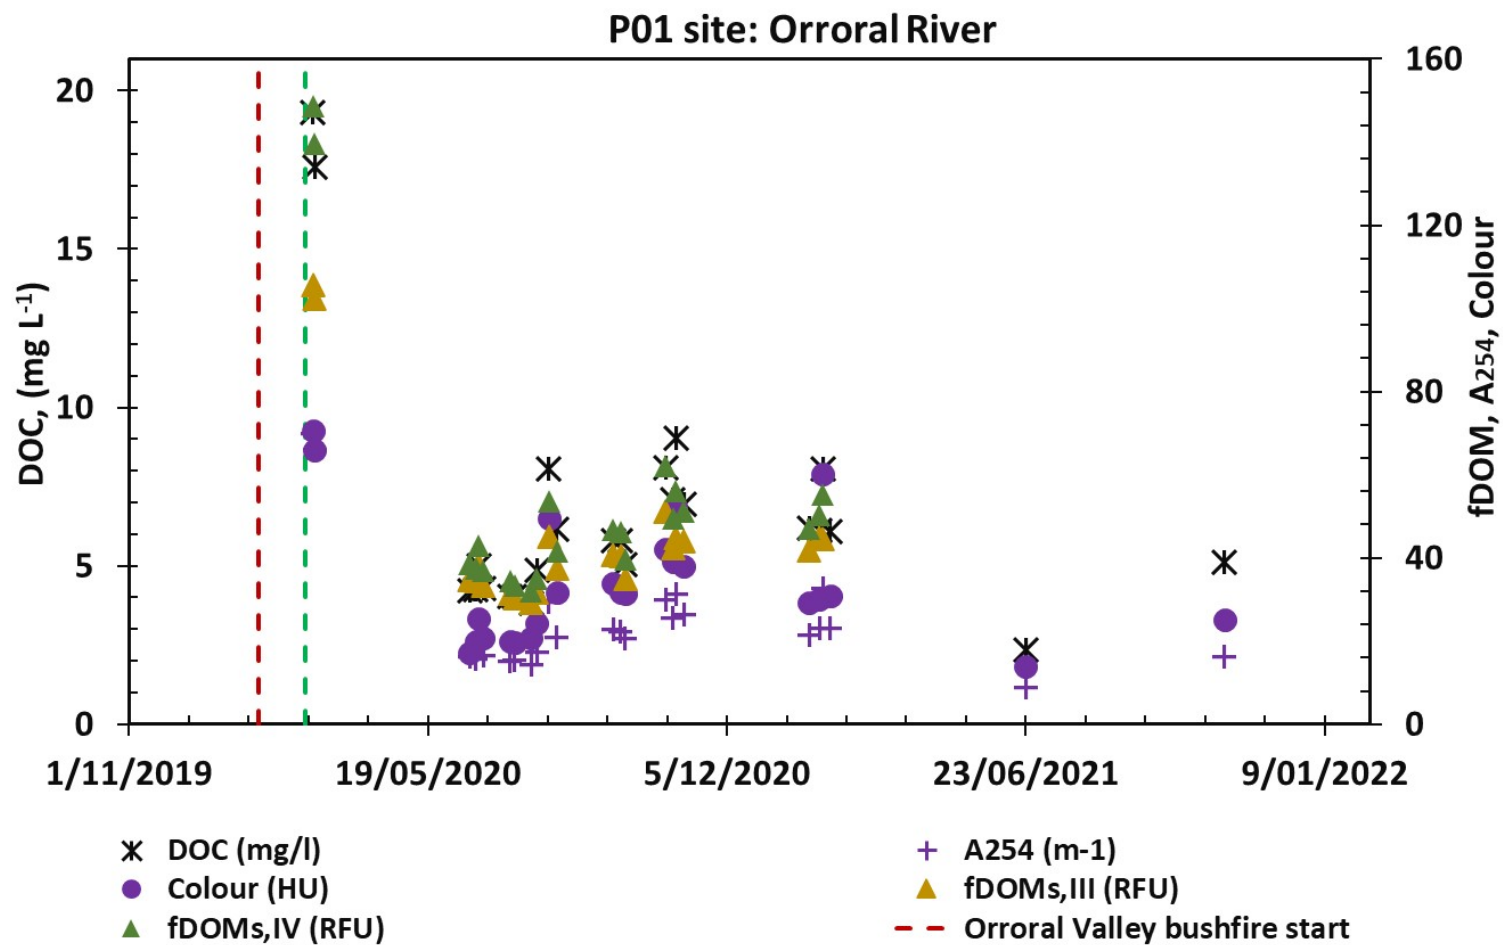

Figure 3.a2

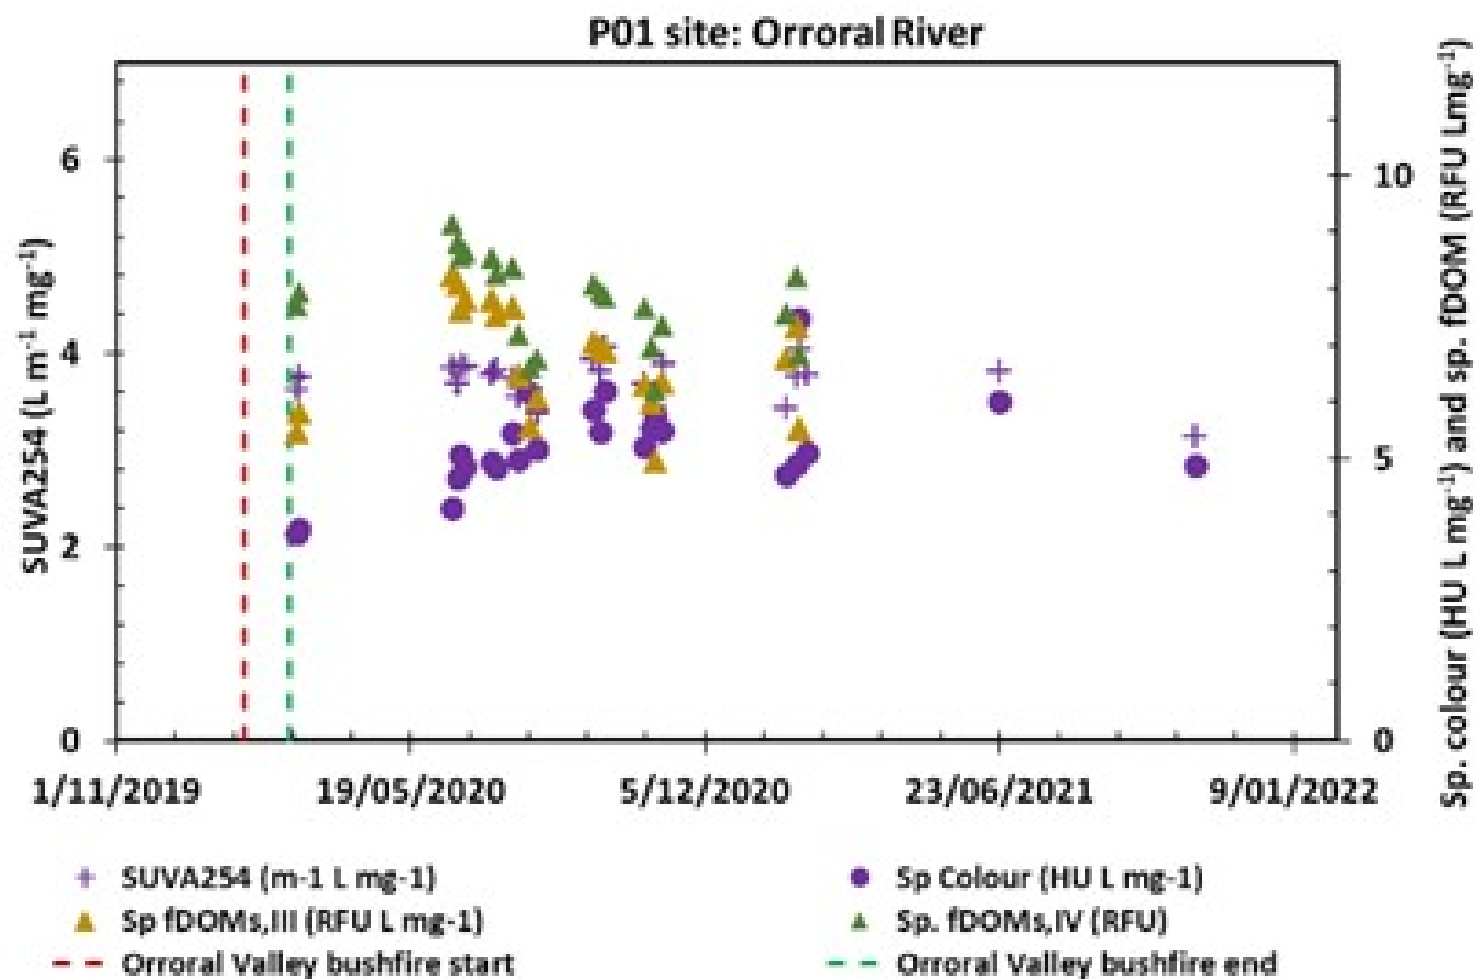

Figure 3.a3

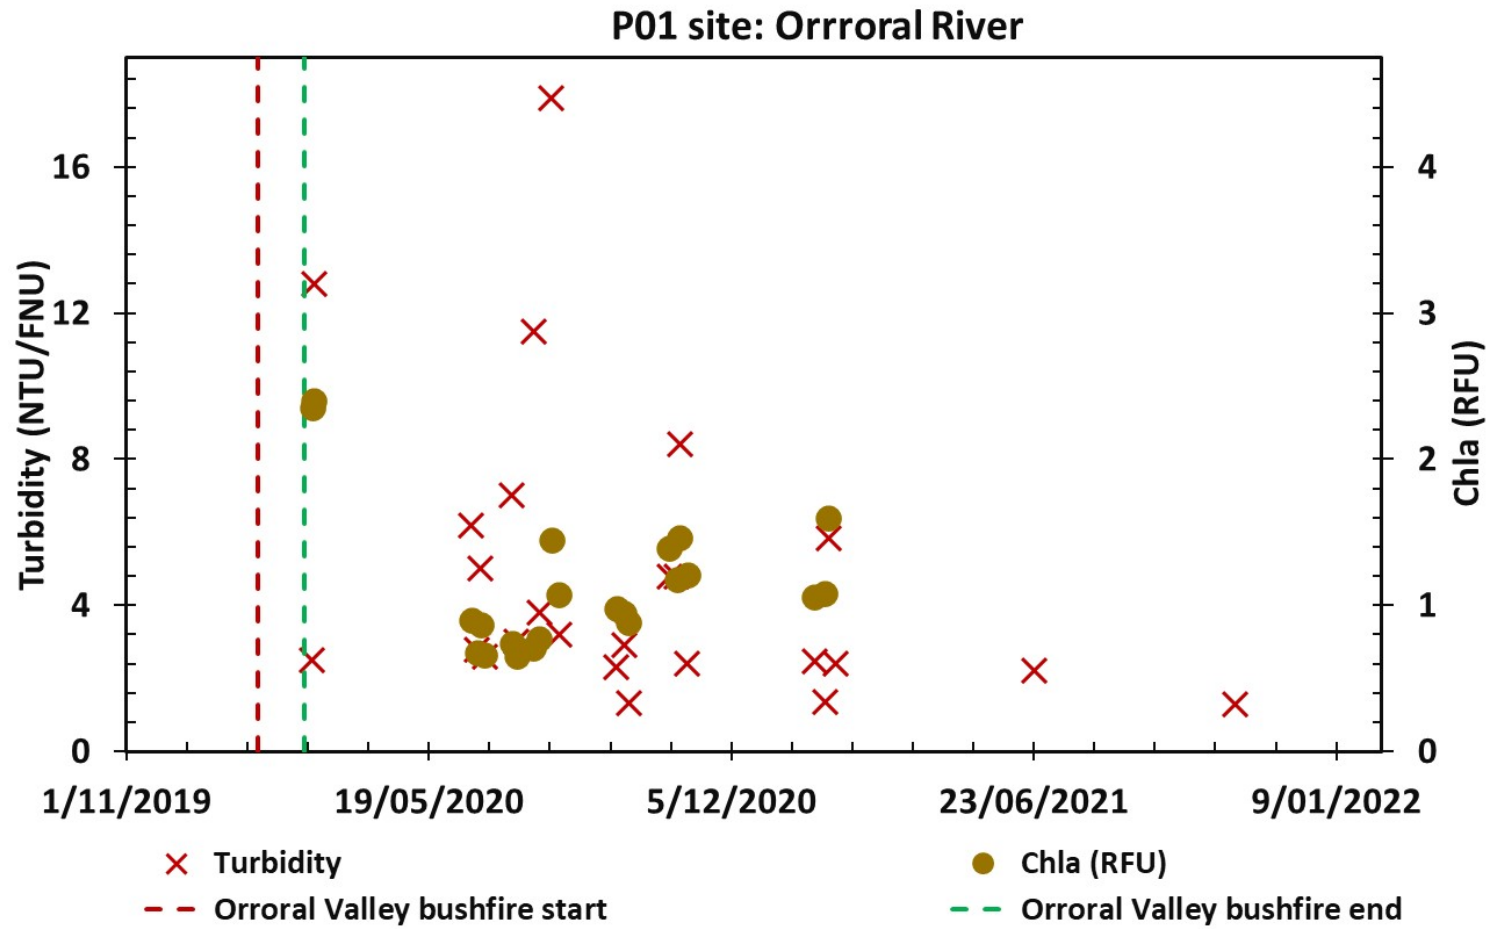

Figure 3.b1

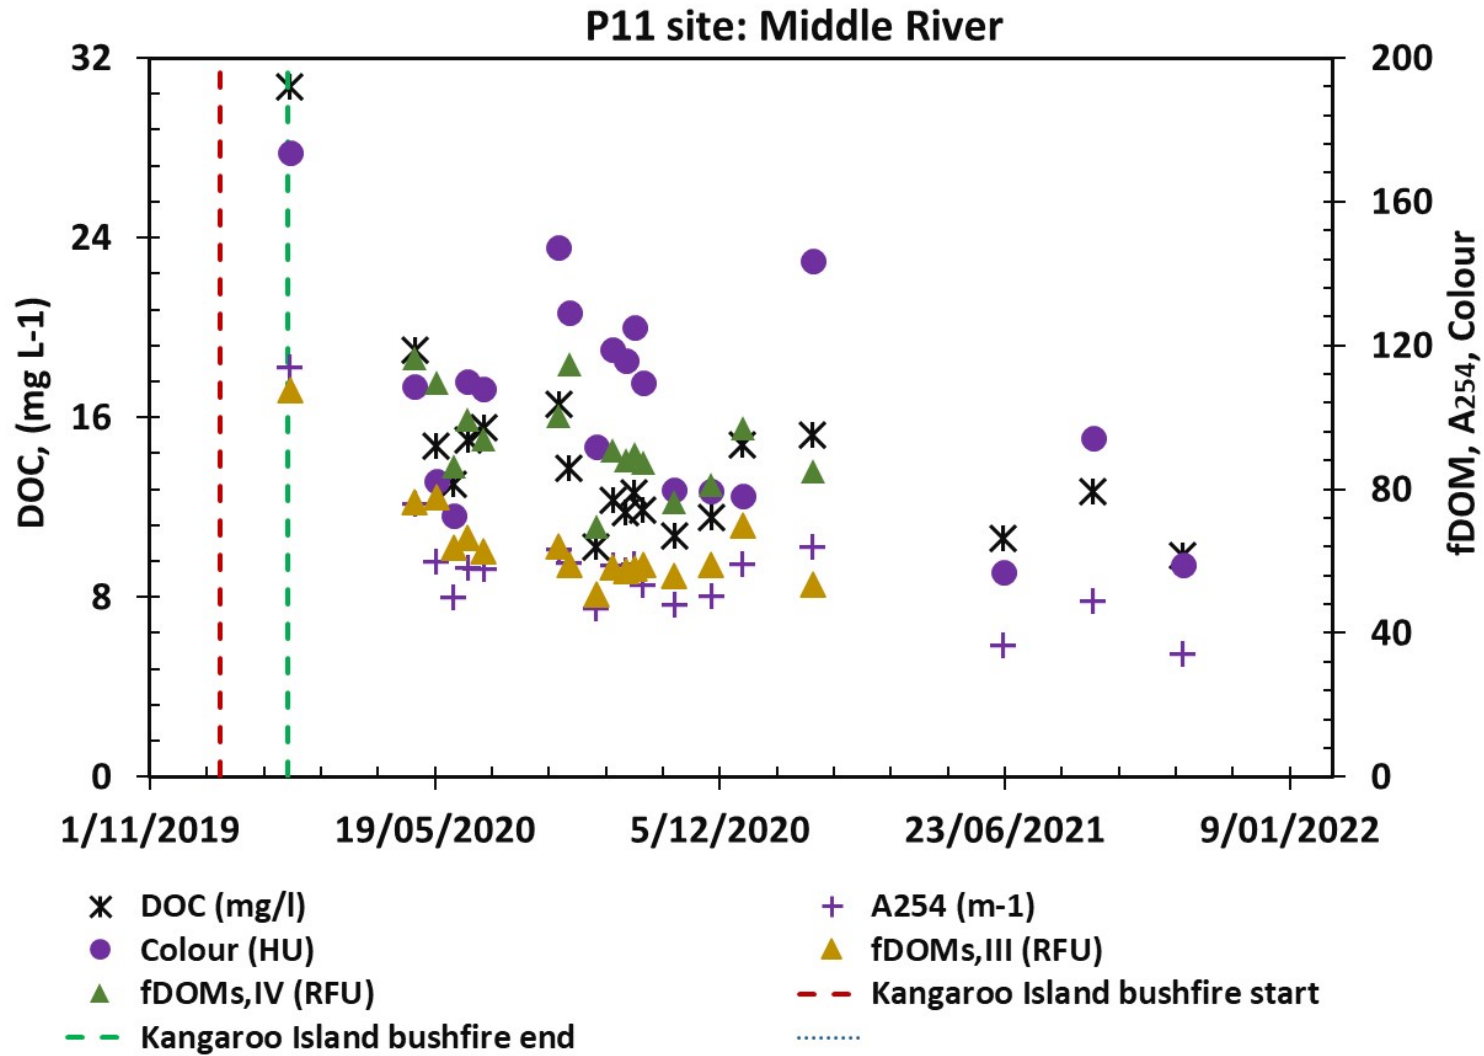

Figure 3.b2

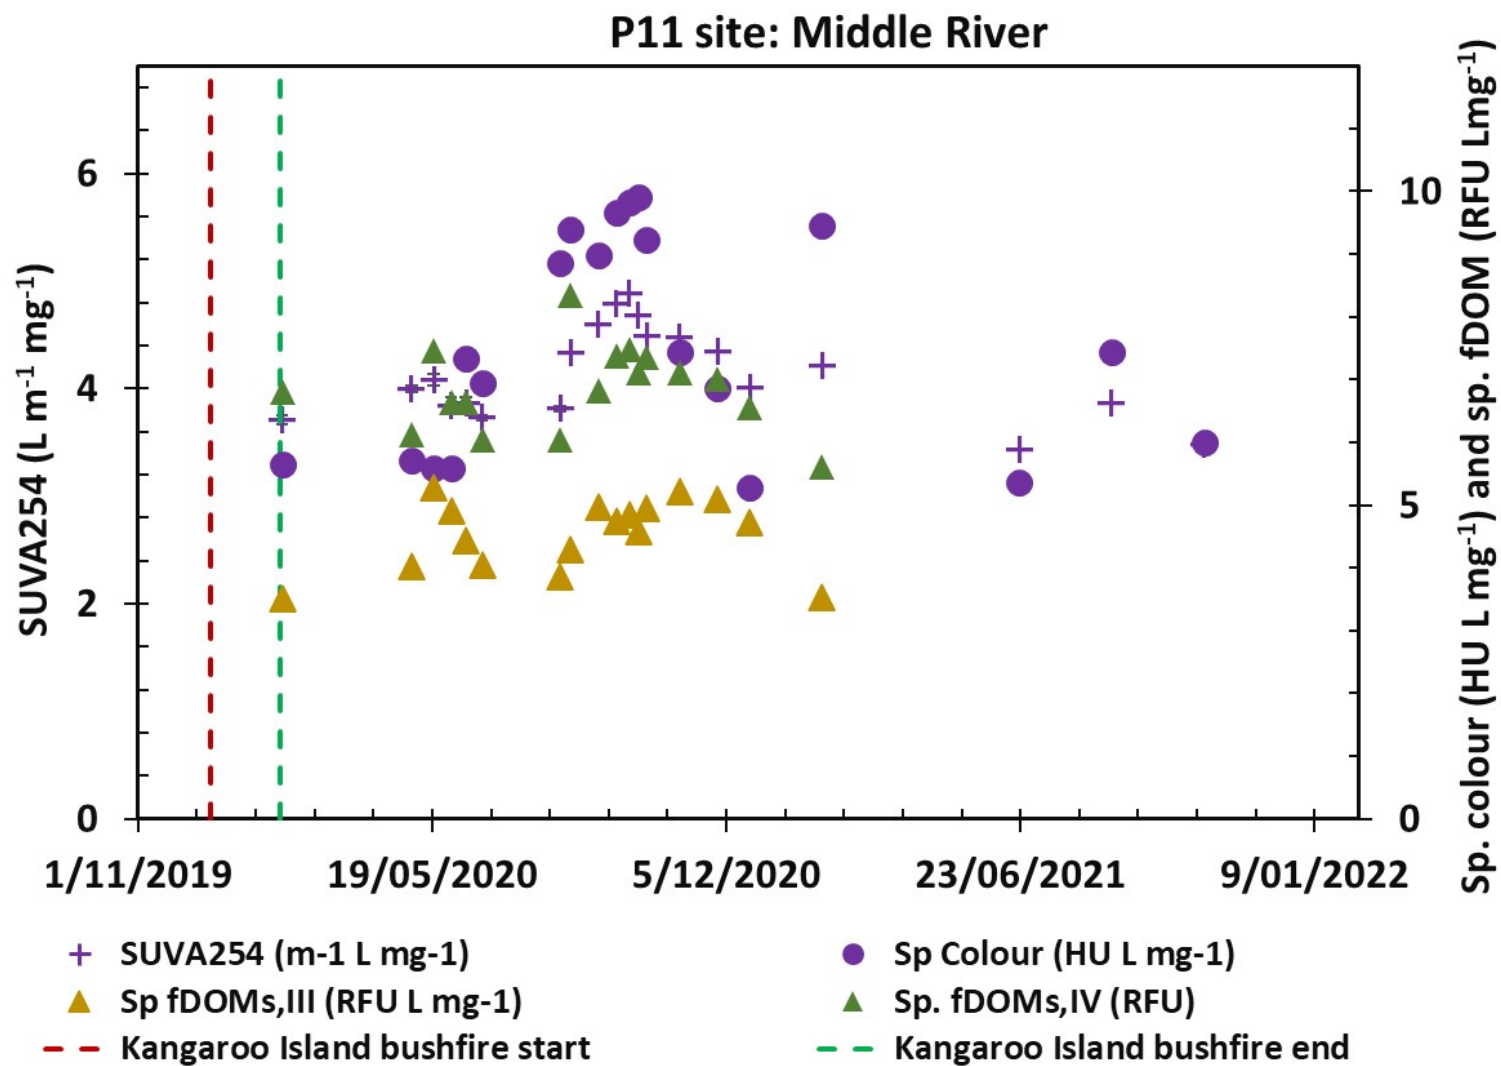

Figure 3.b3

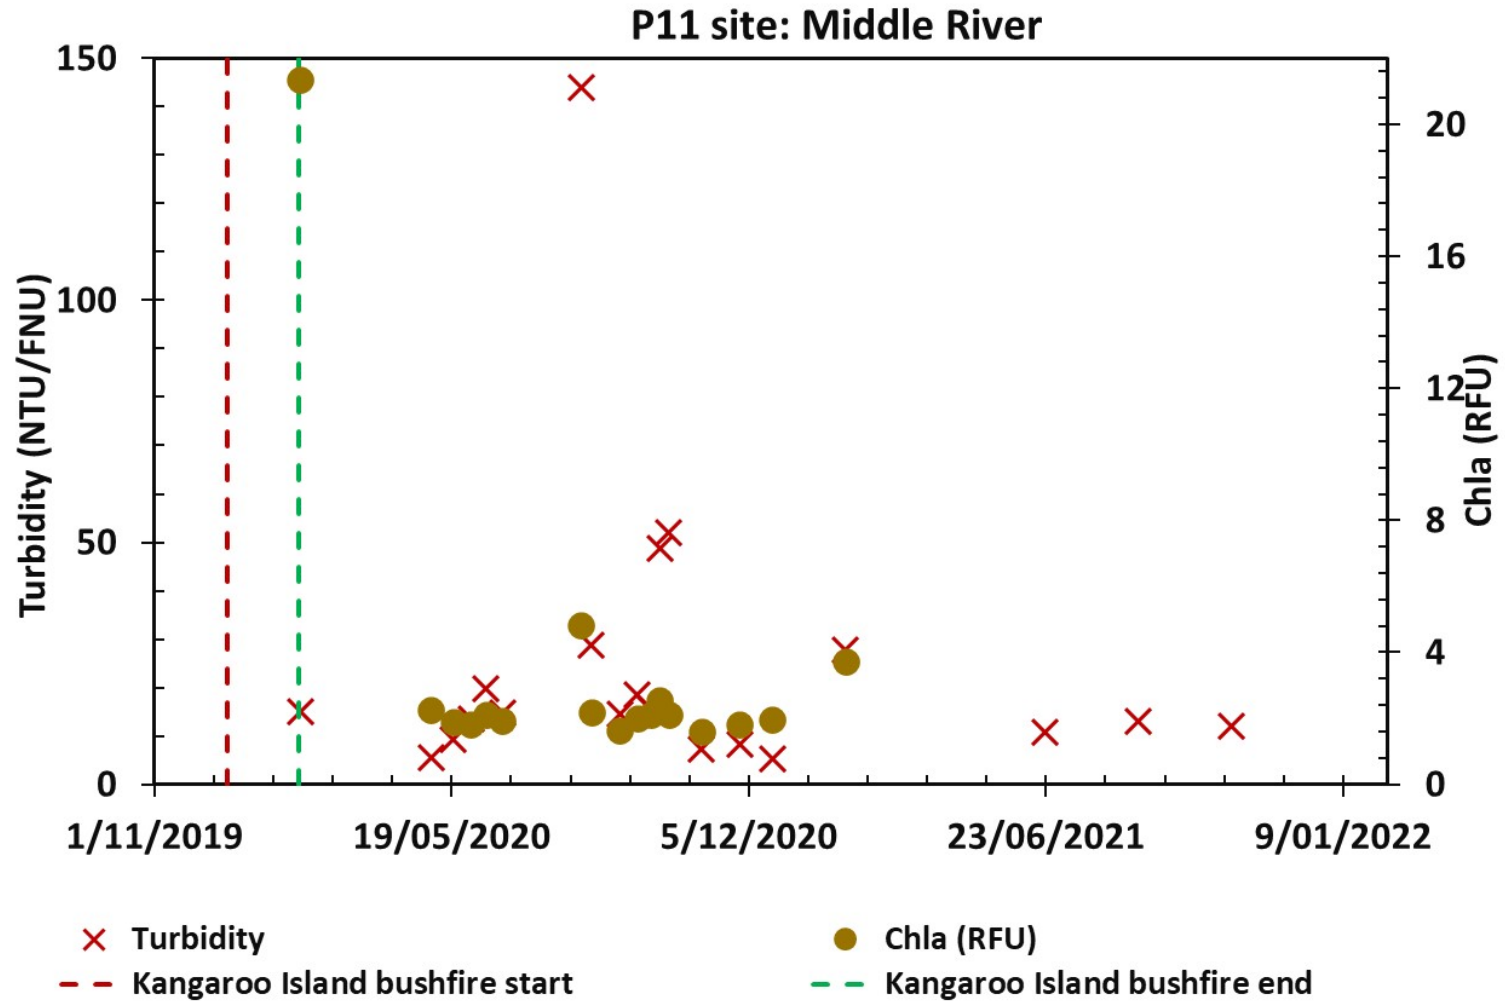

Figure 4.a1

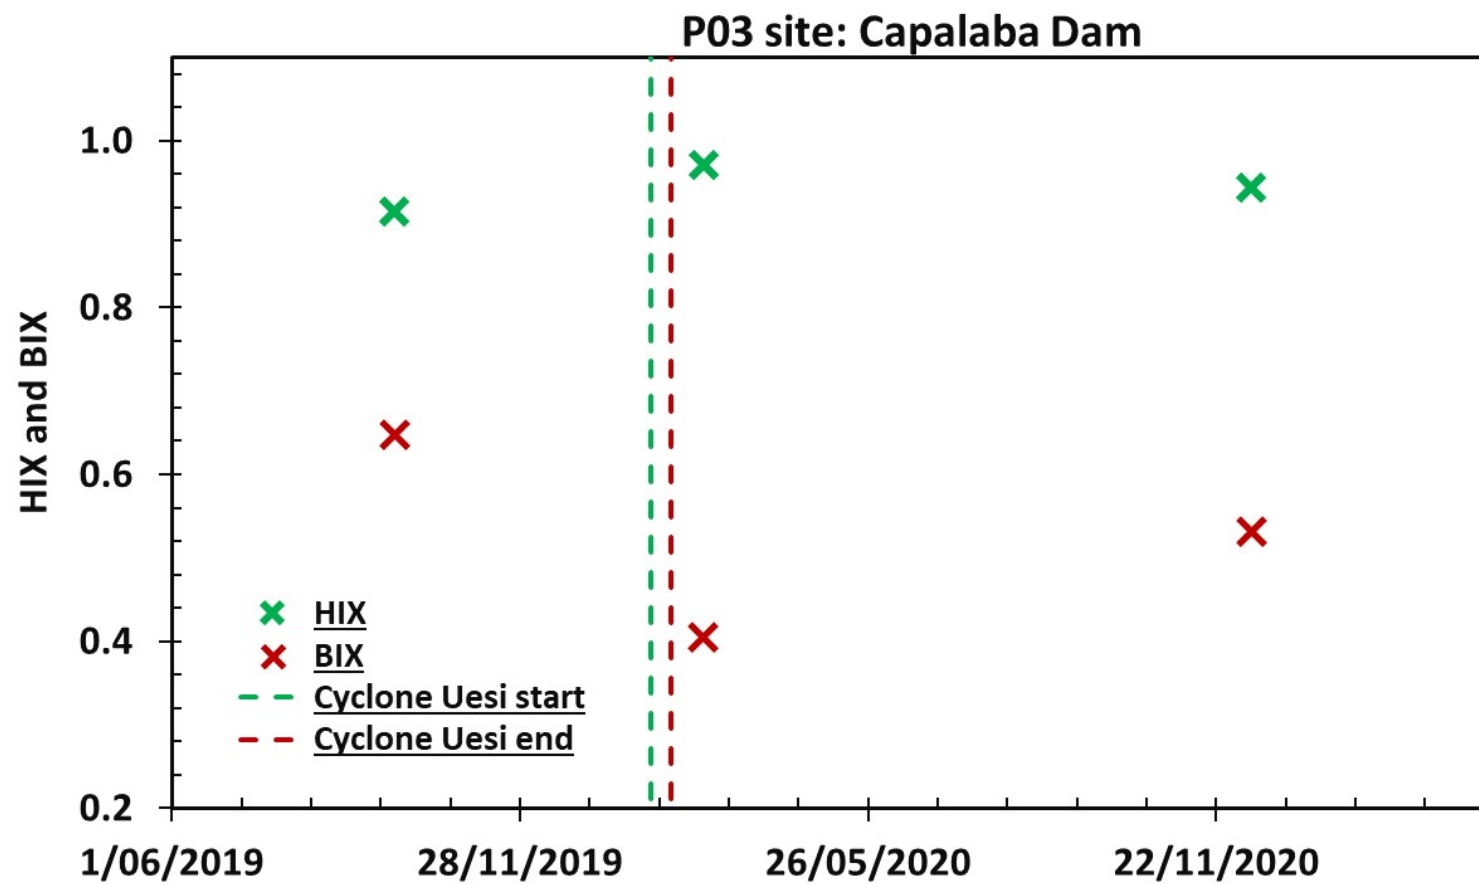



Figure 4.a2

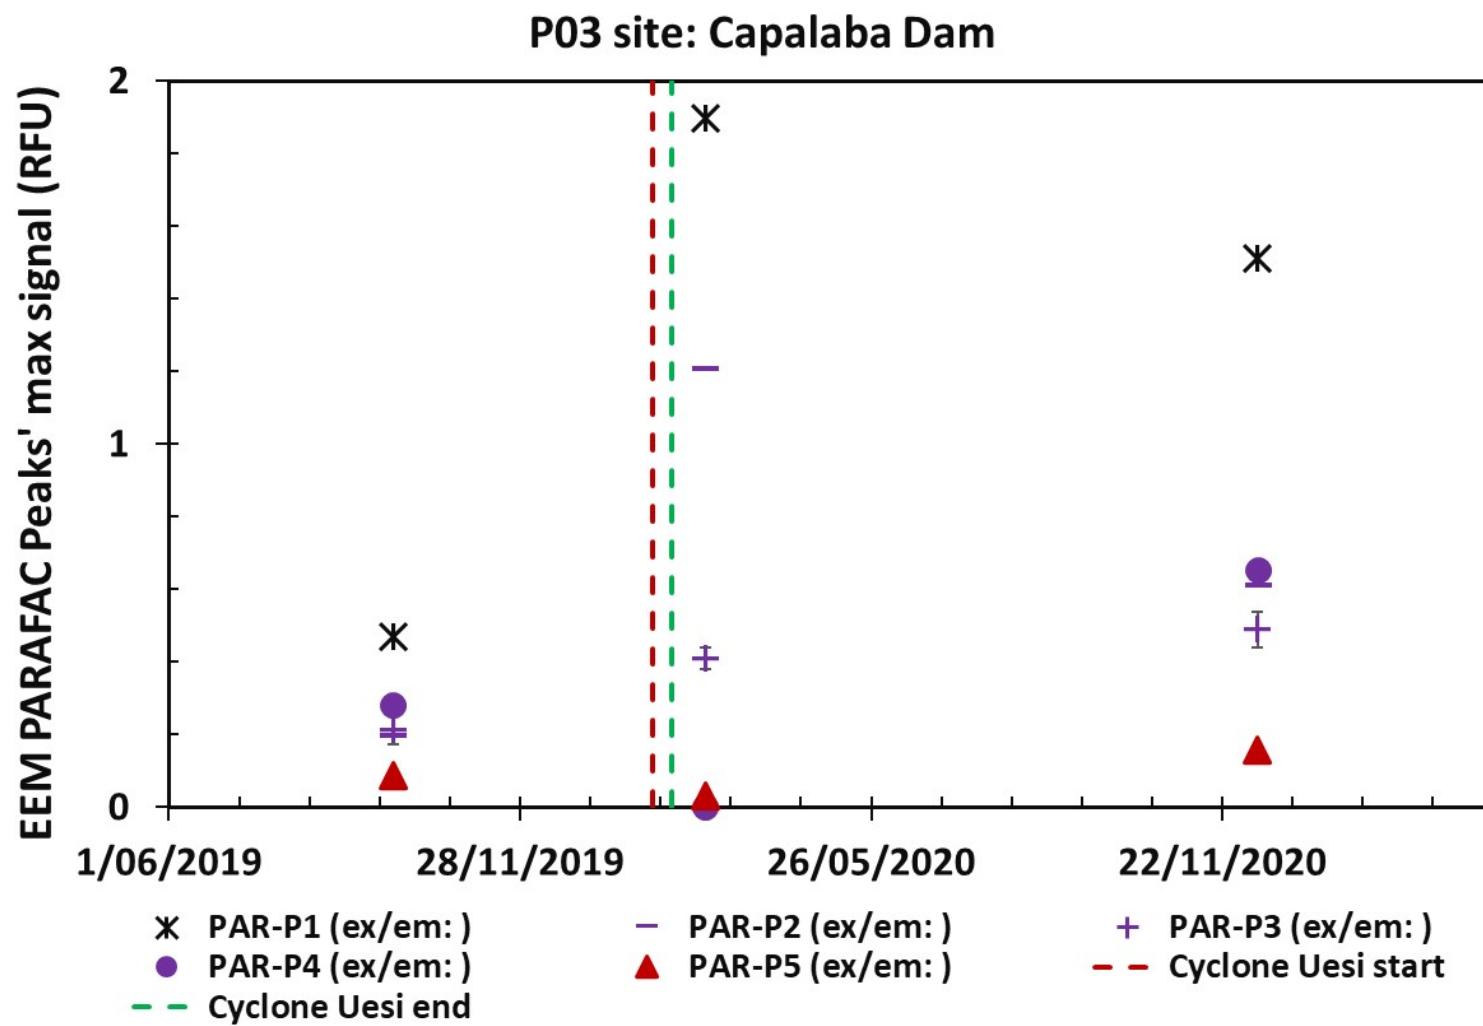

Figure 4.b1

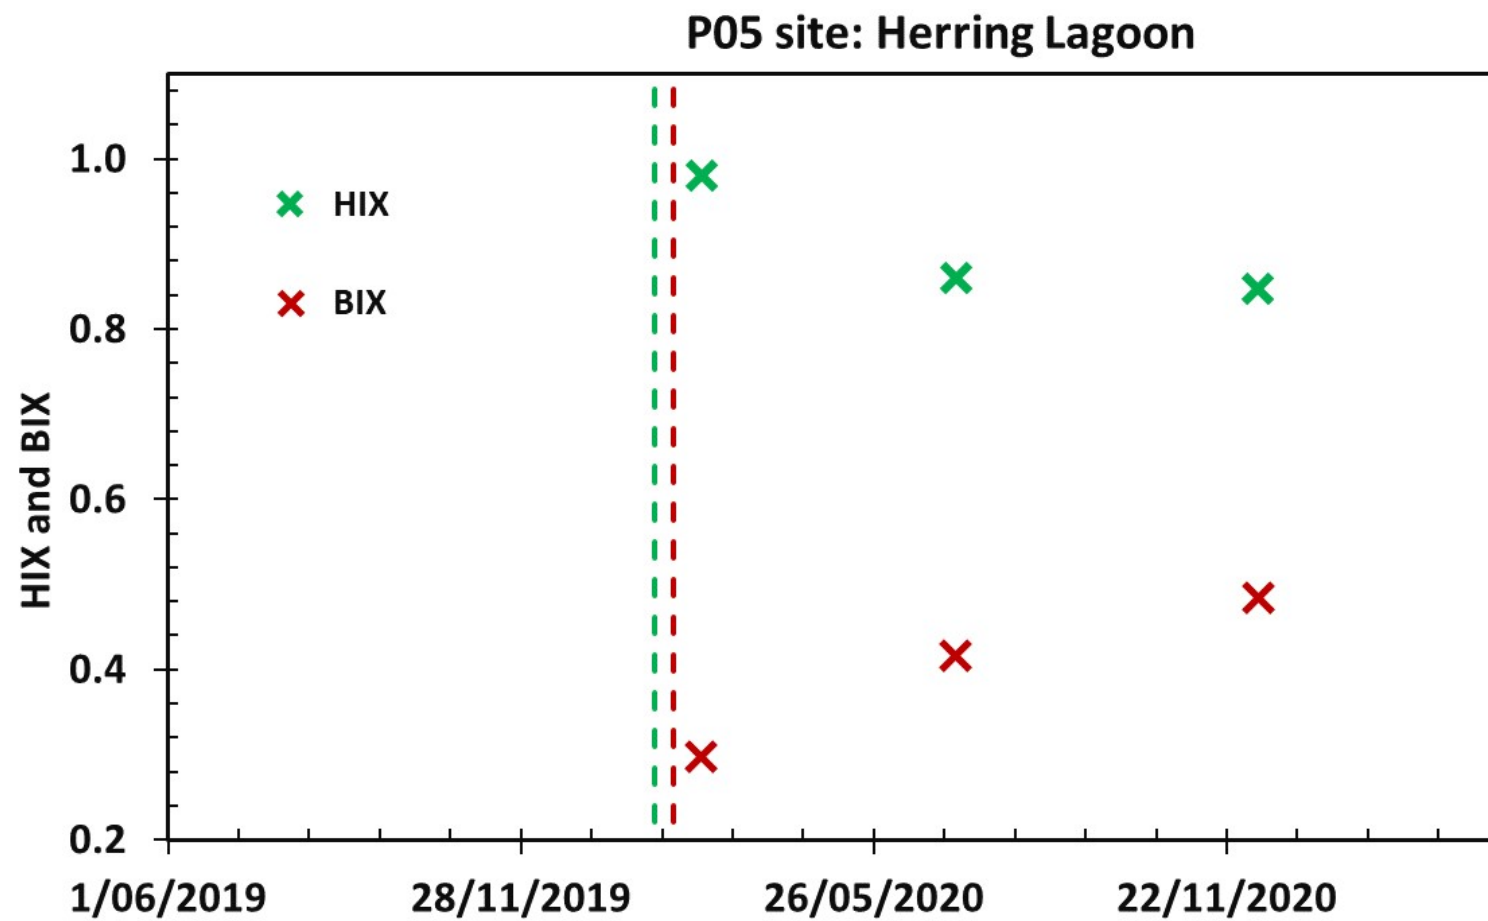

Figure 4.b2

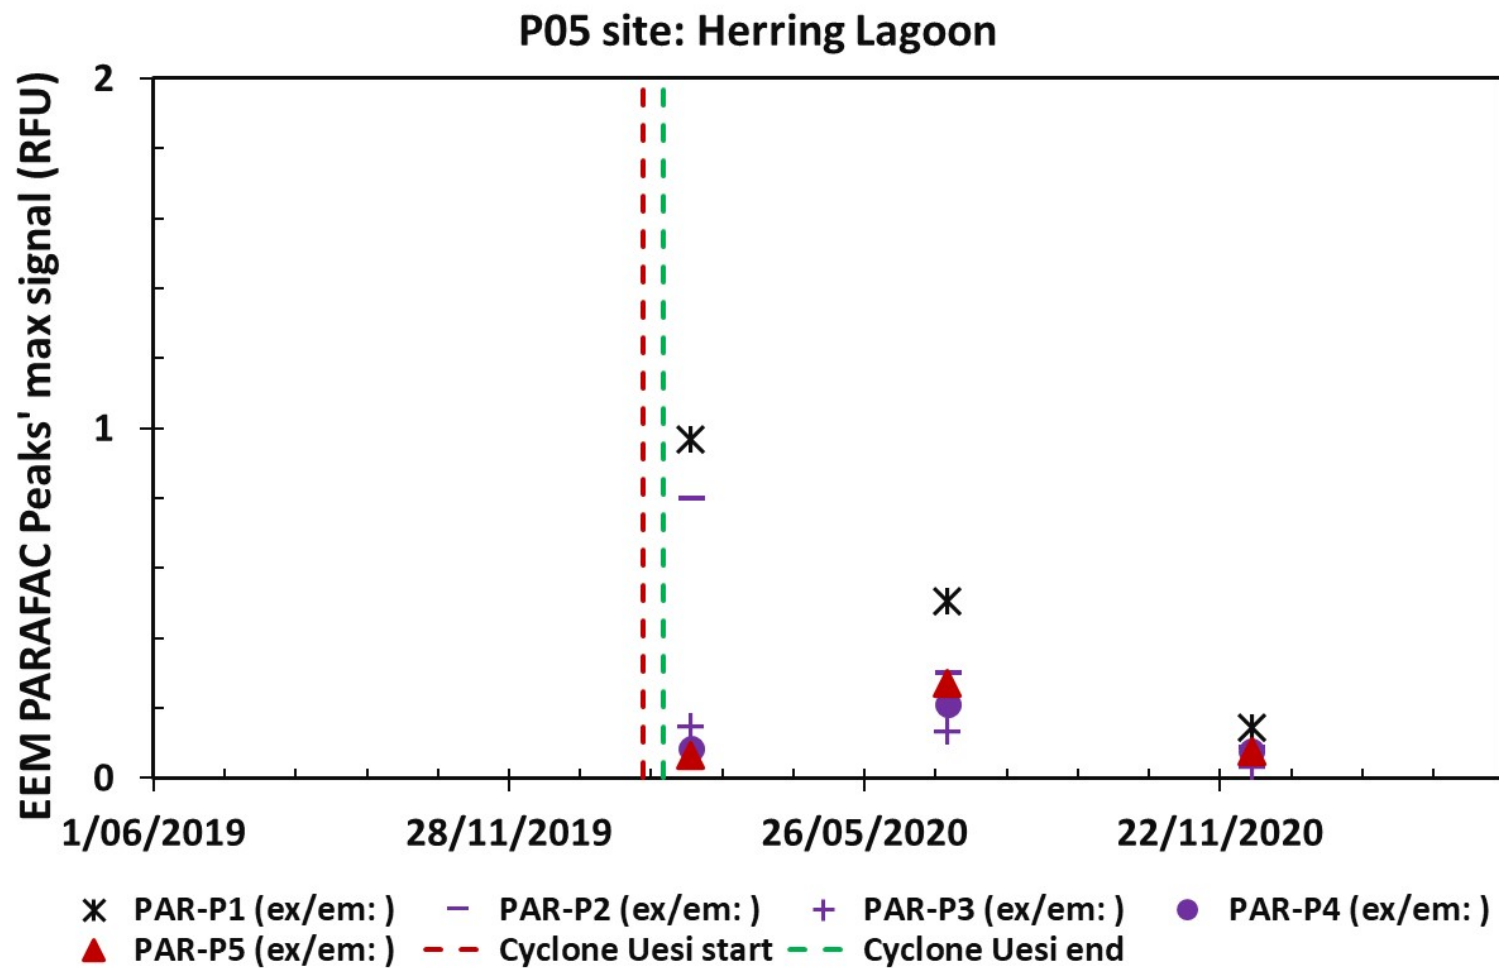

Figure 5.a1

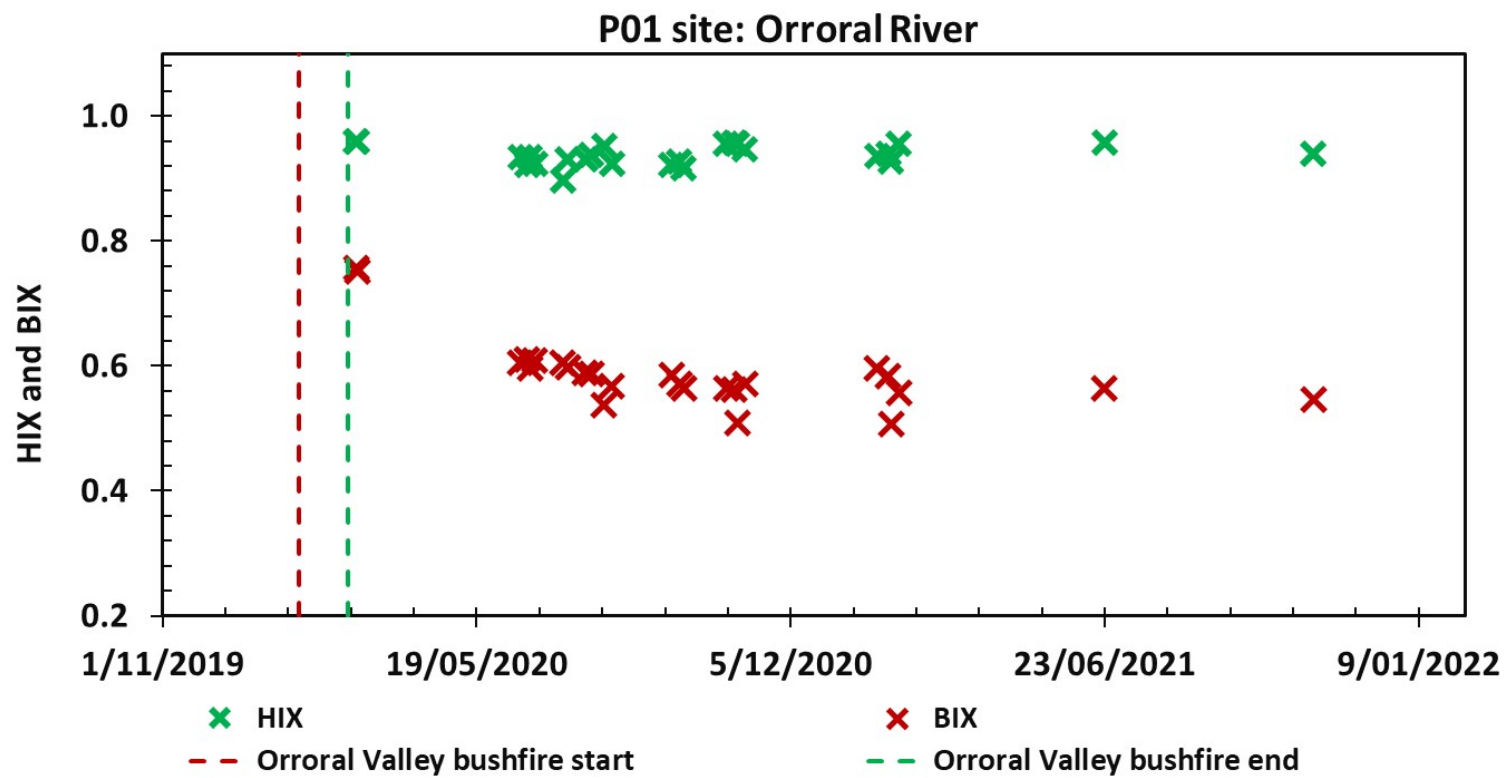

Figure 5.a2

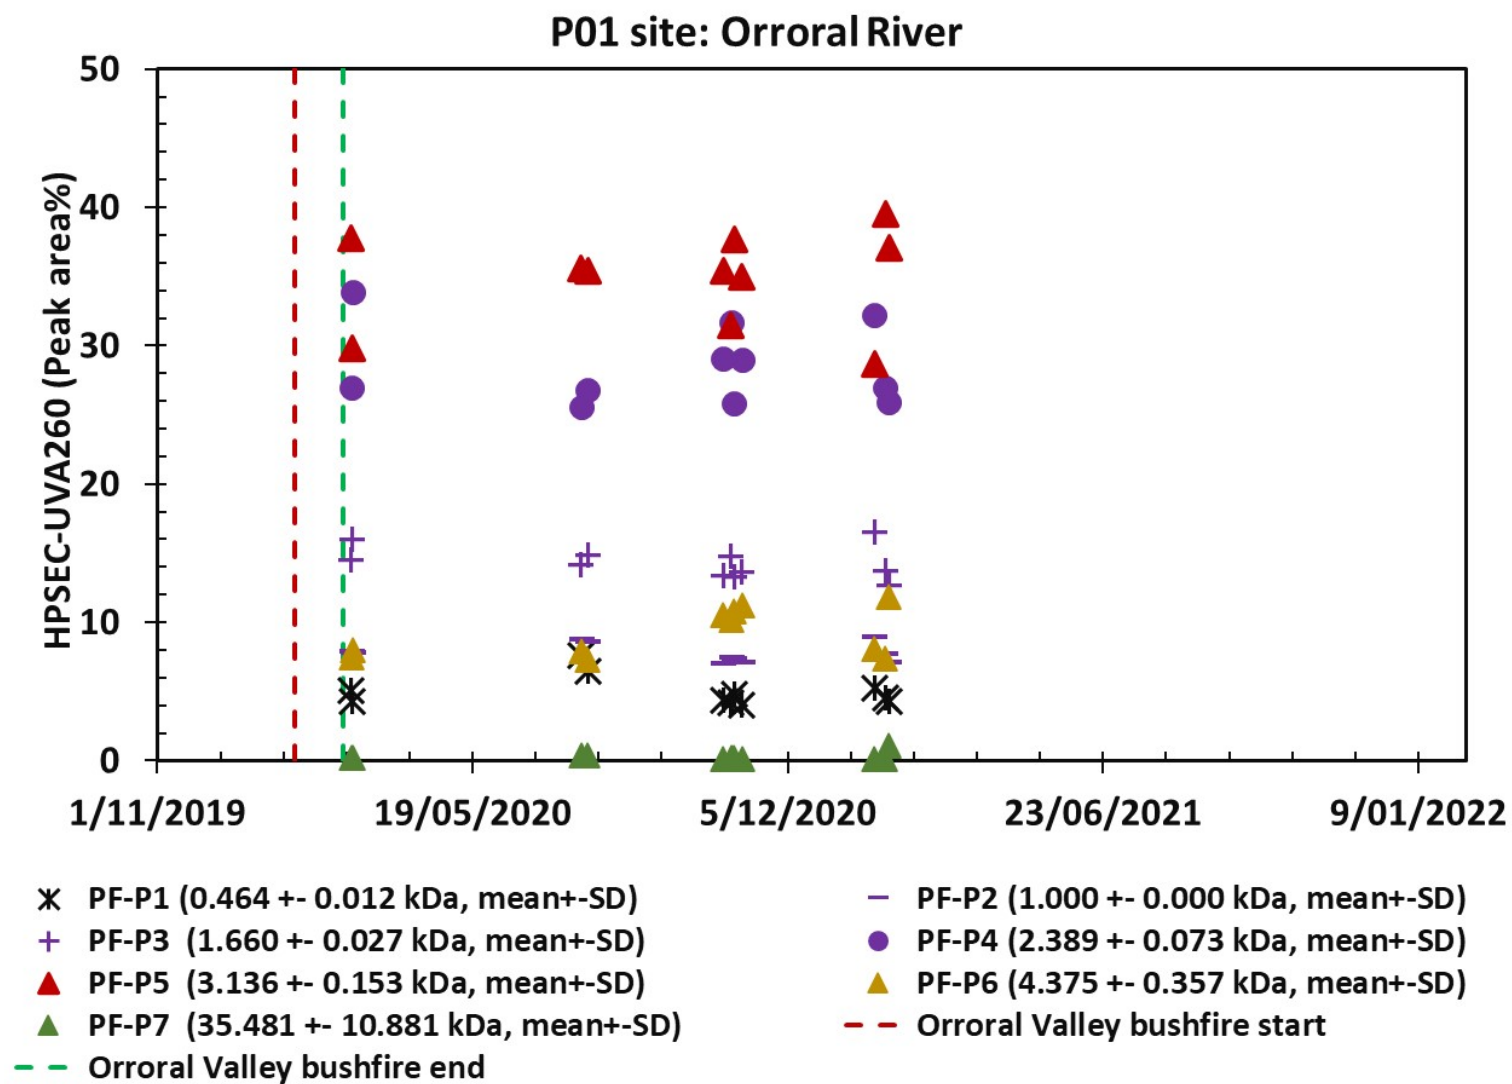



Figure 5.b2

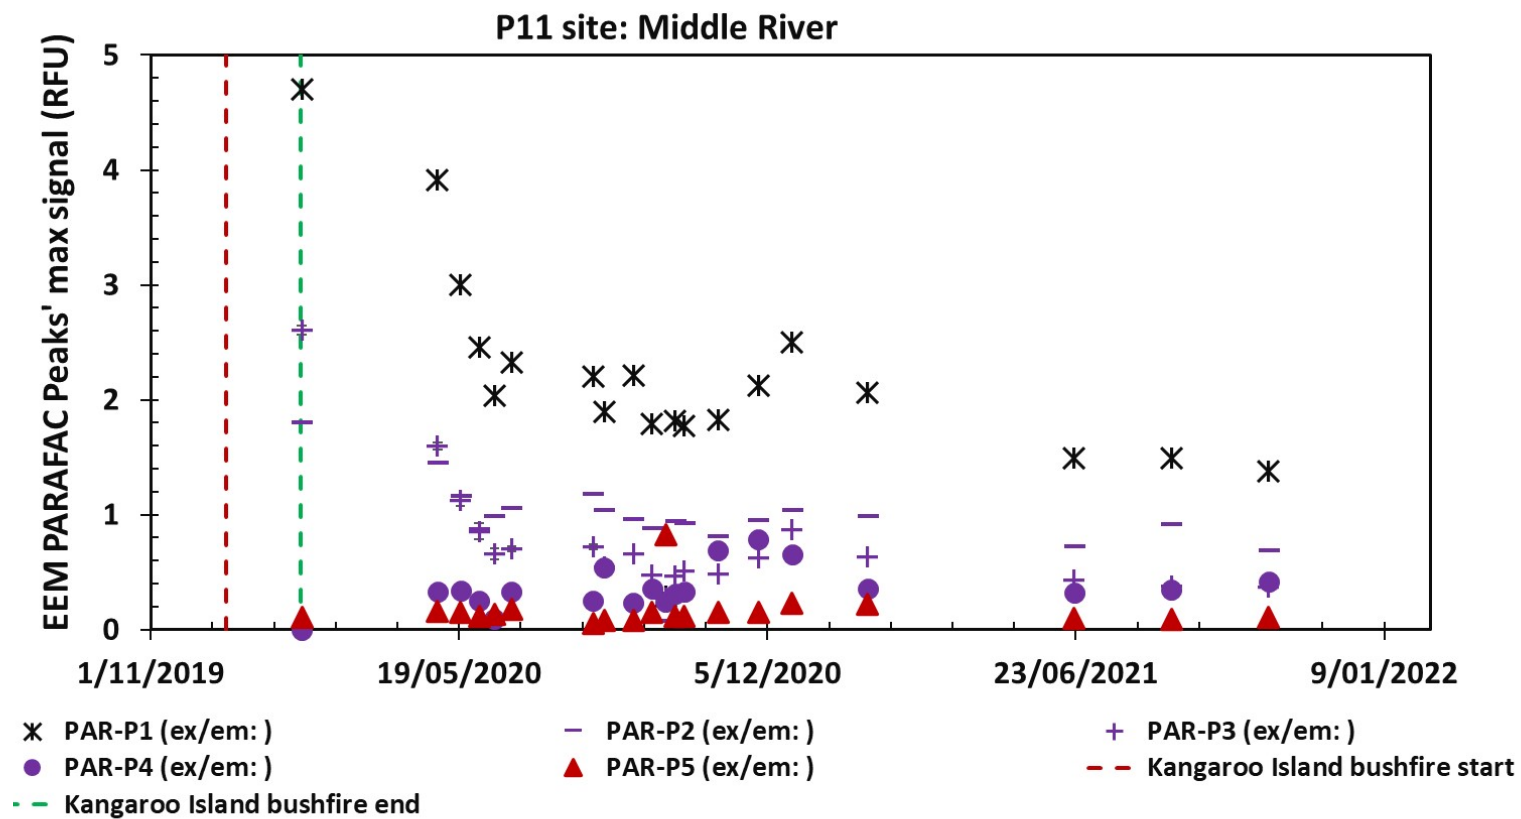

Figure 6.a1

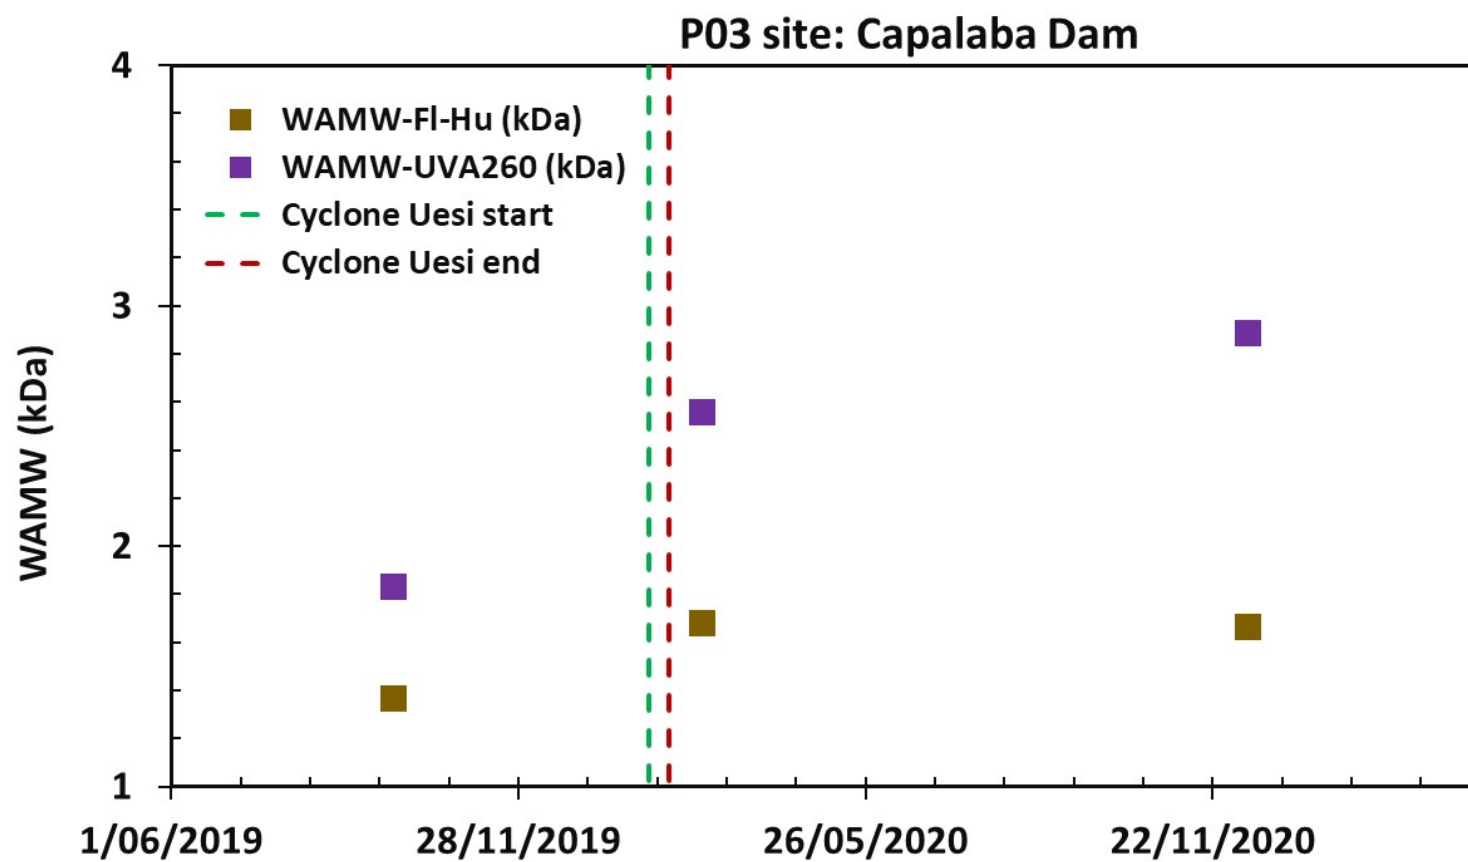



Figure 6.a2

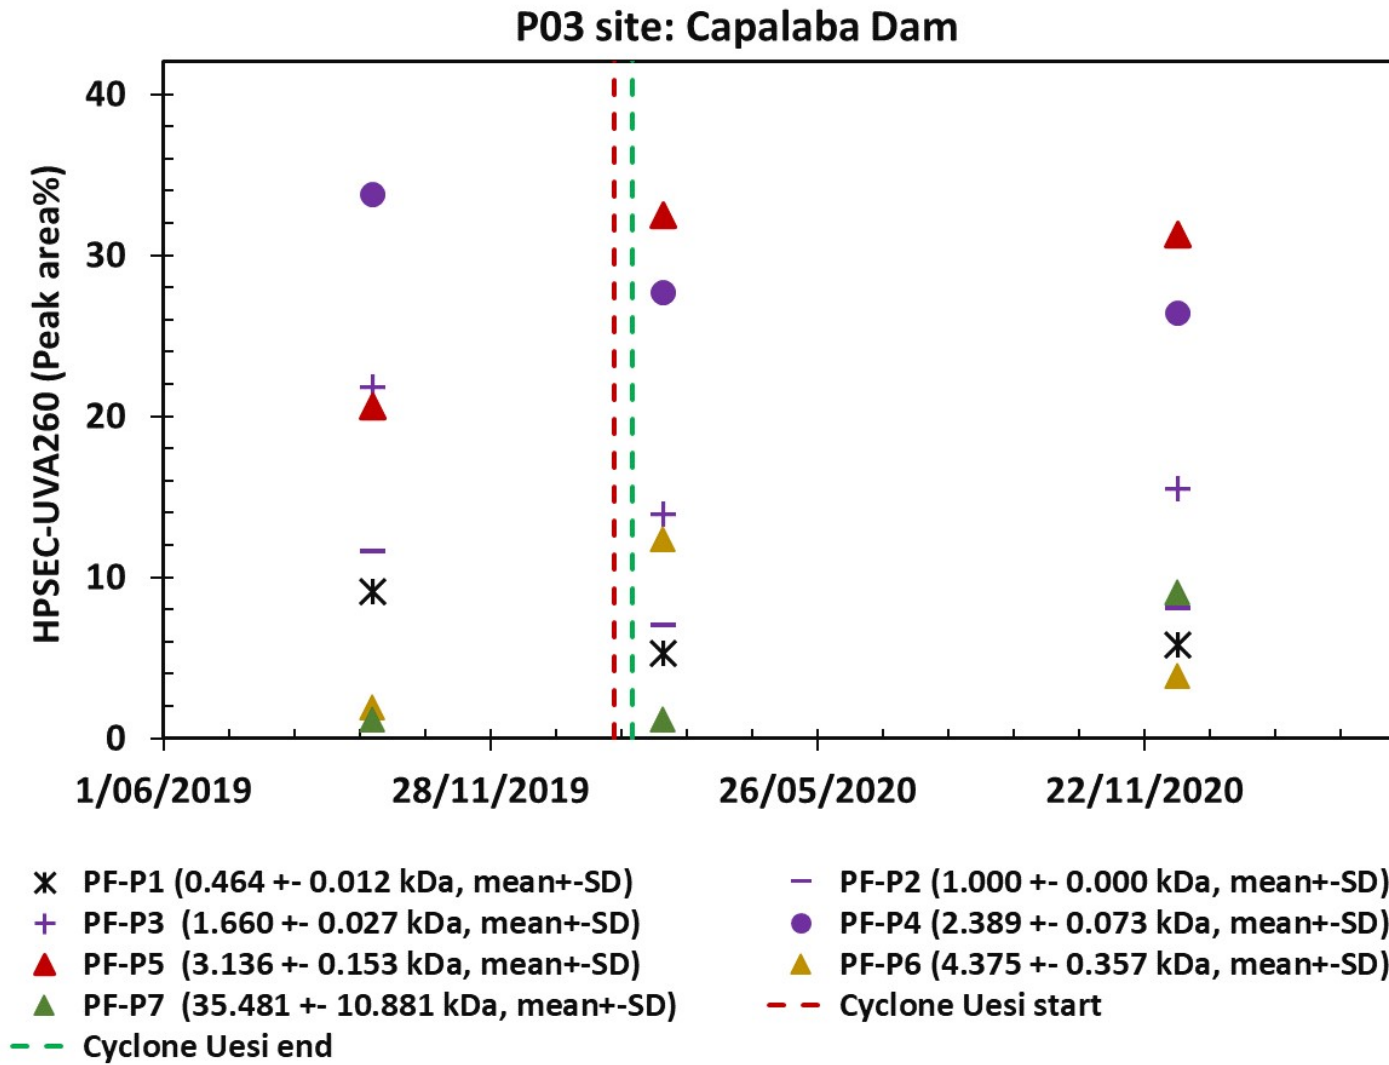

Figure 6.a3

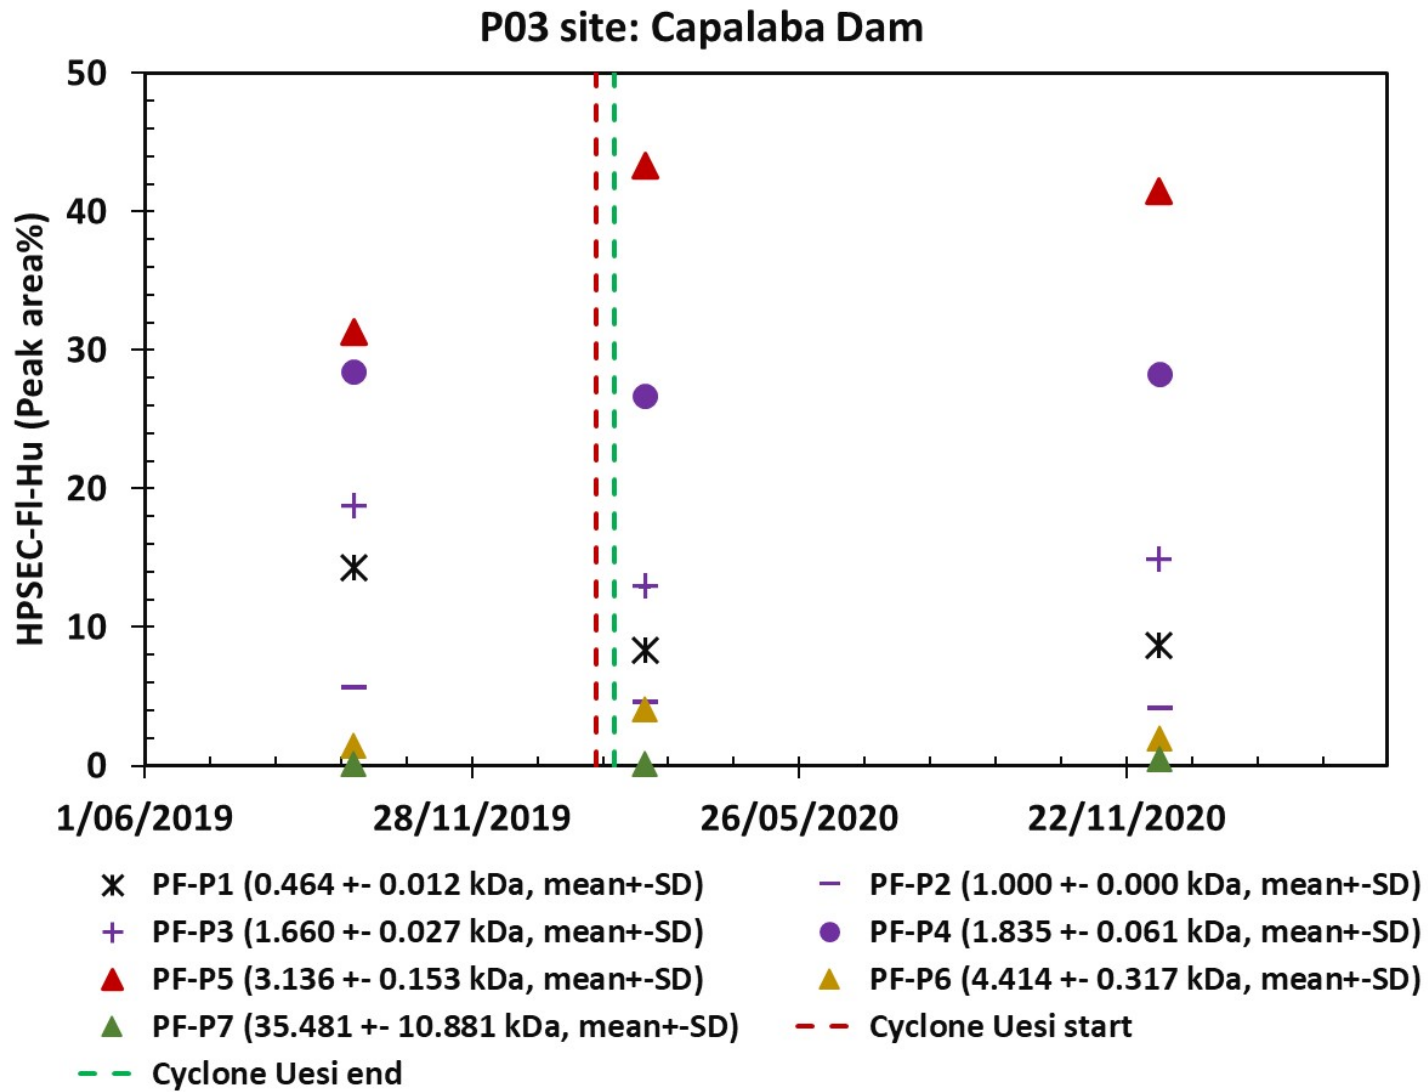

Figure 6.b1

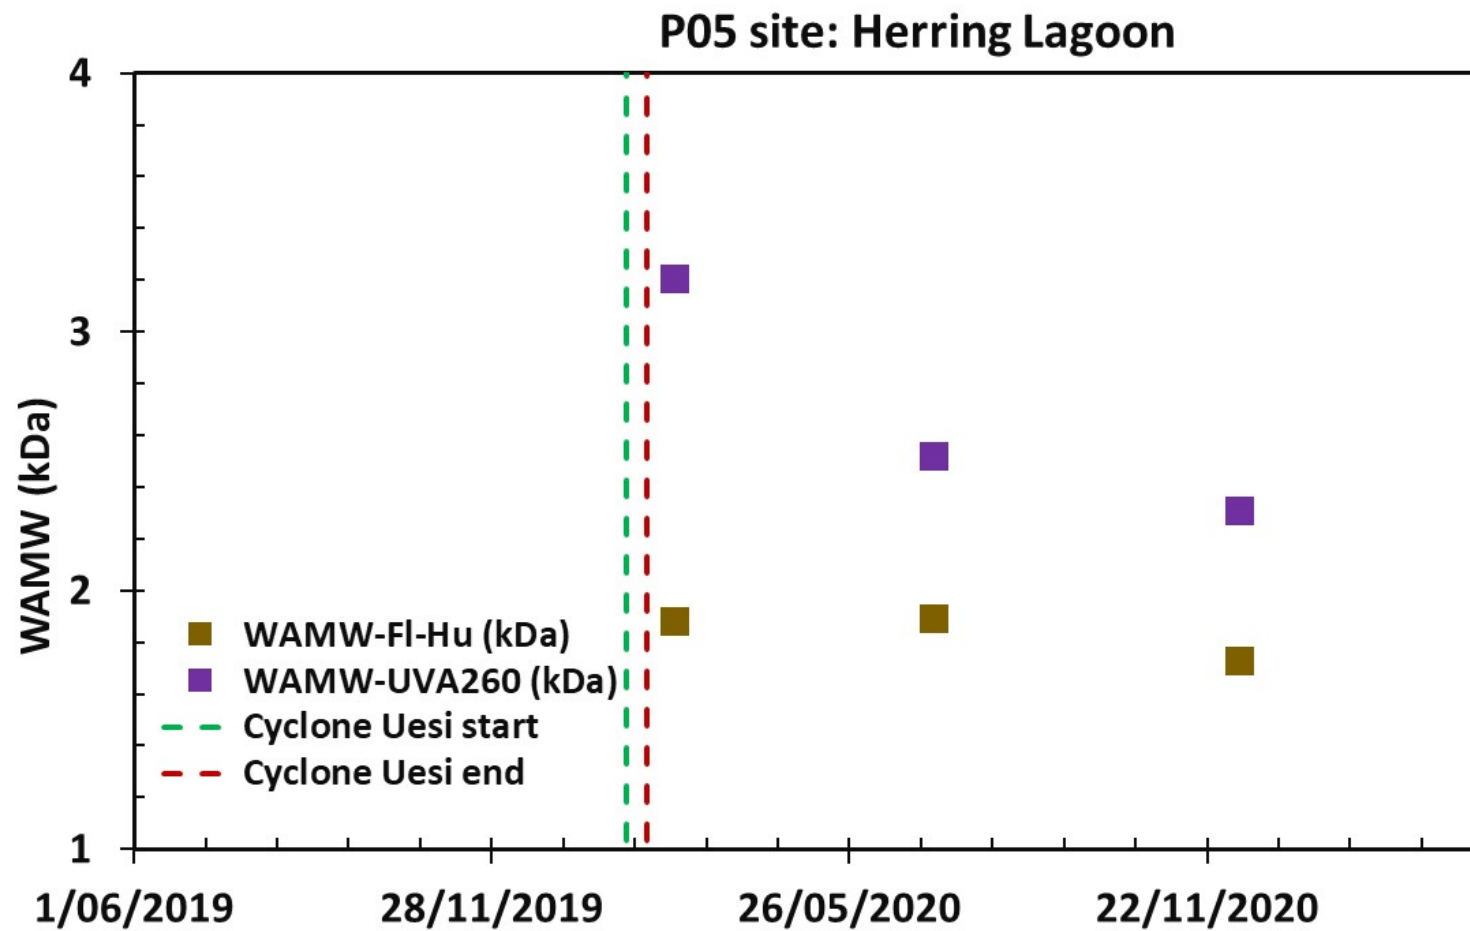

Figure 6.b2

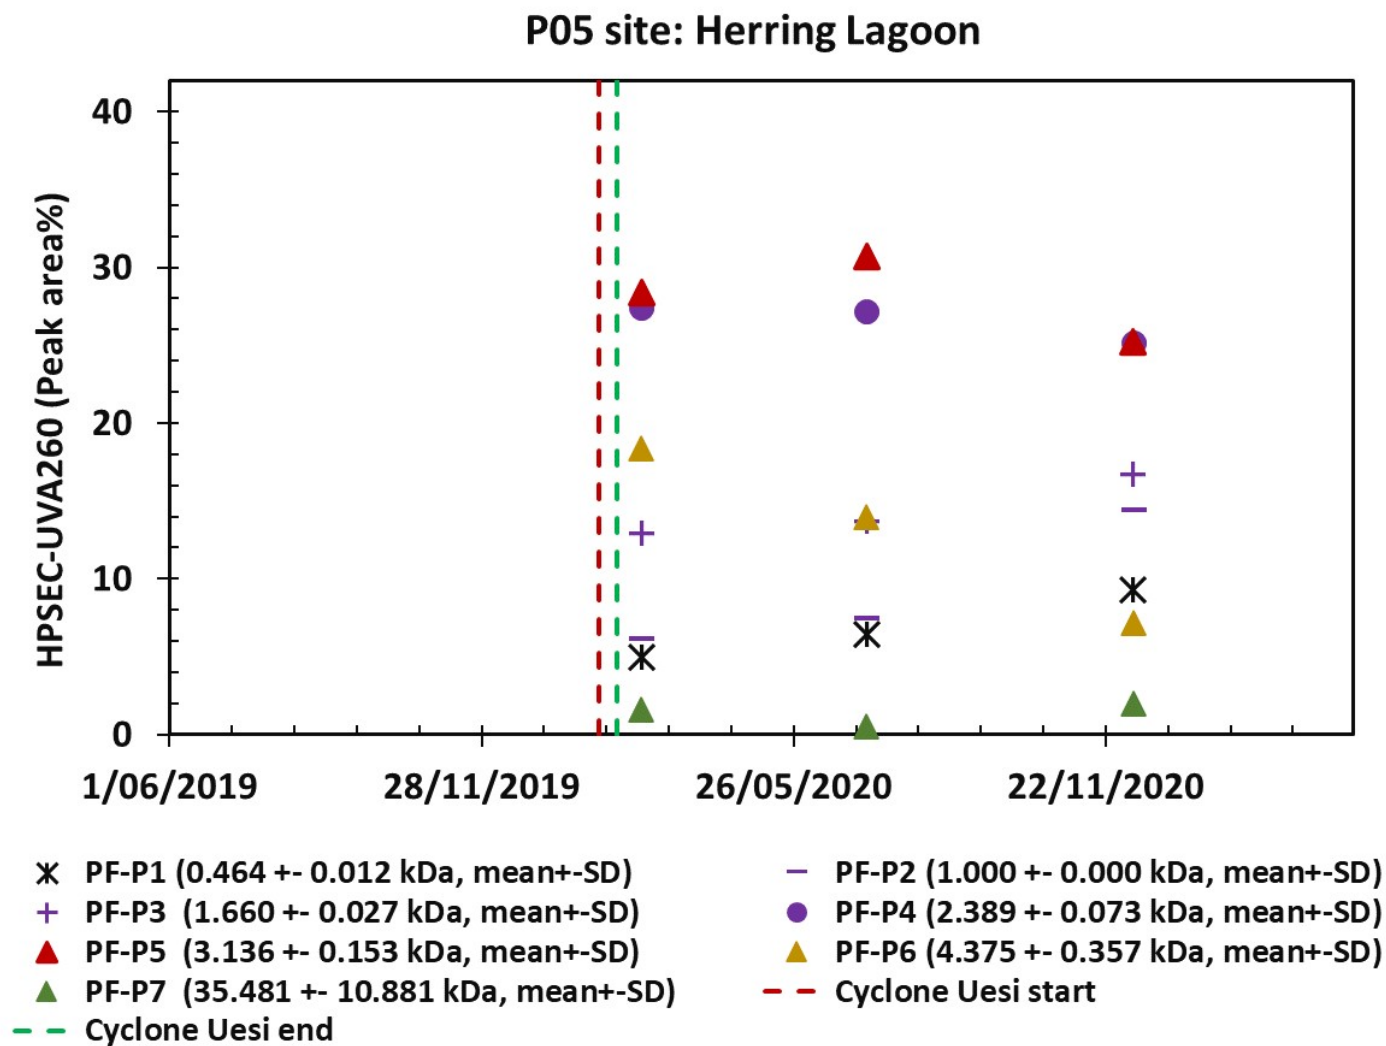

Figure 6.b3

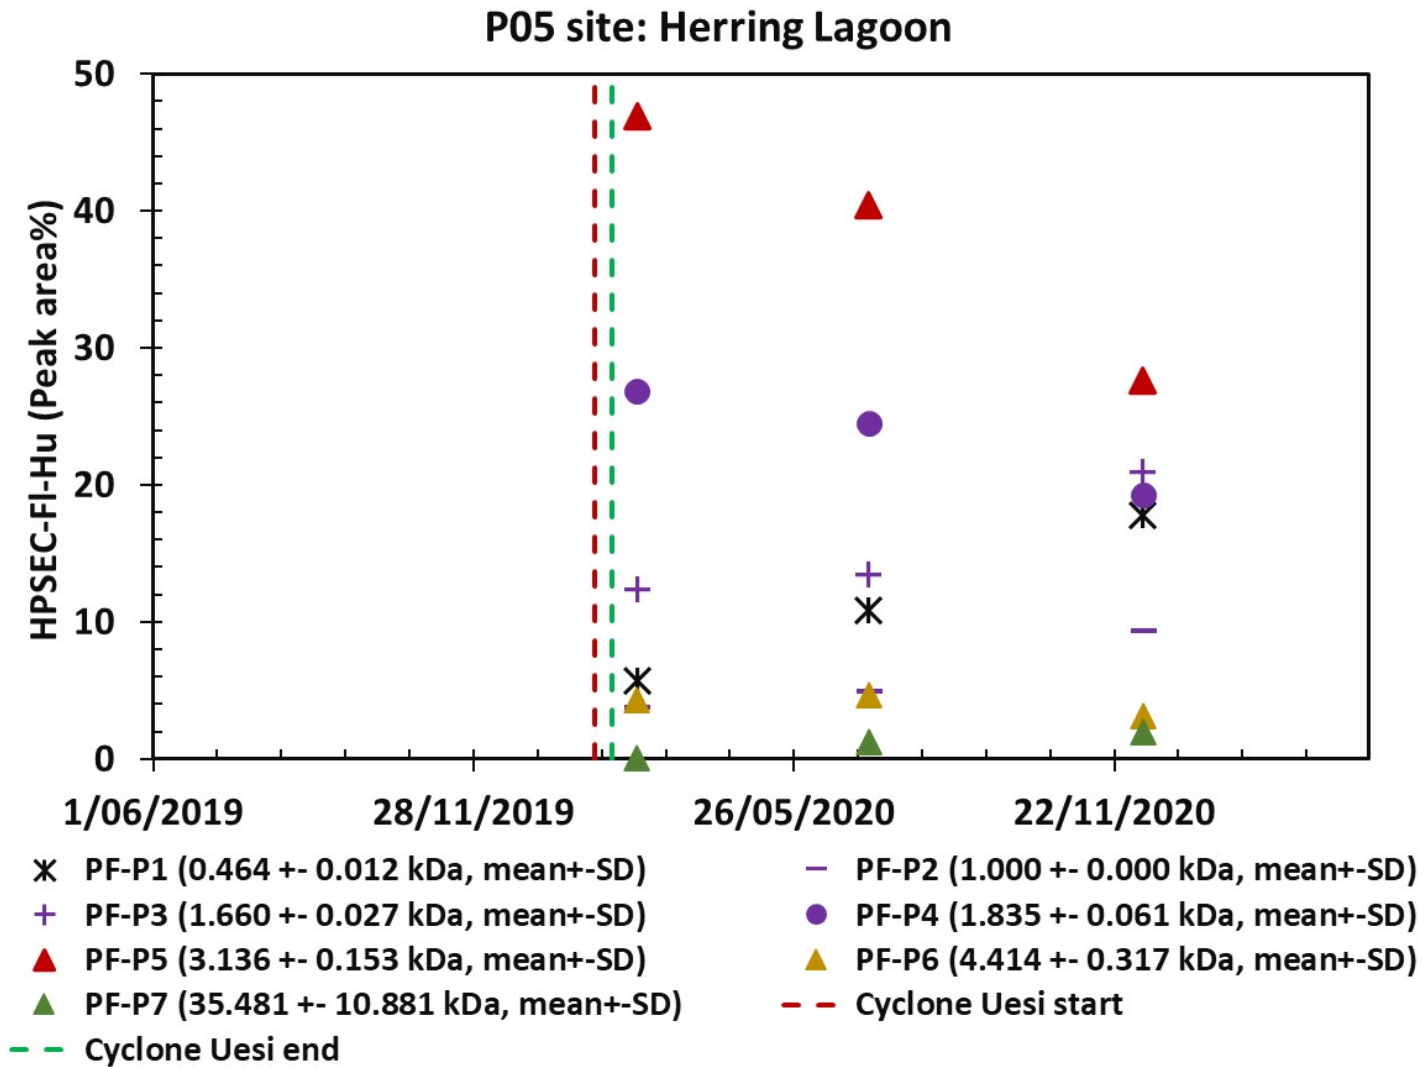

Figure 7.a1

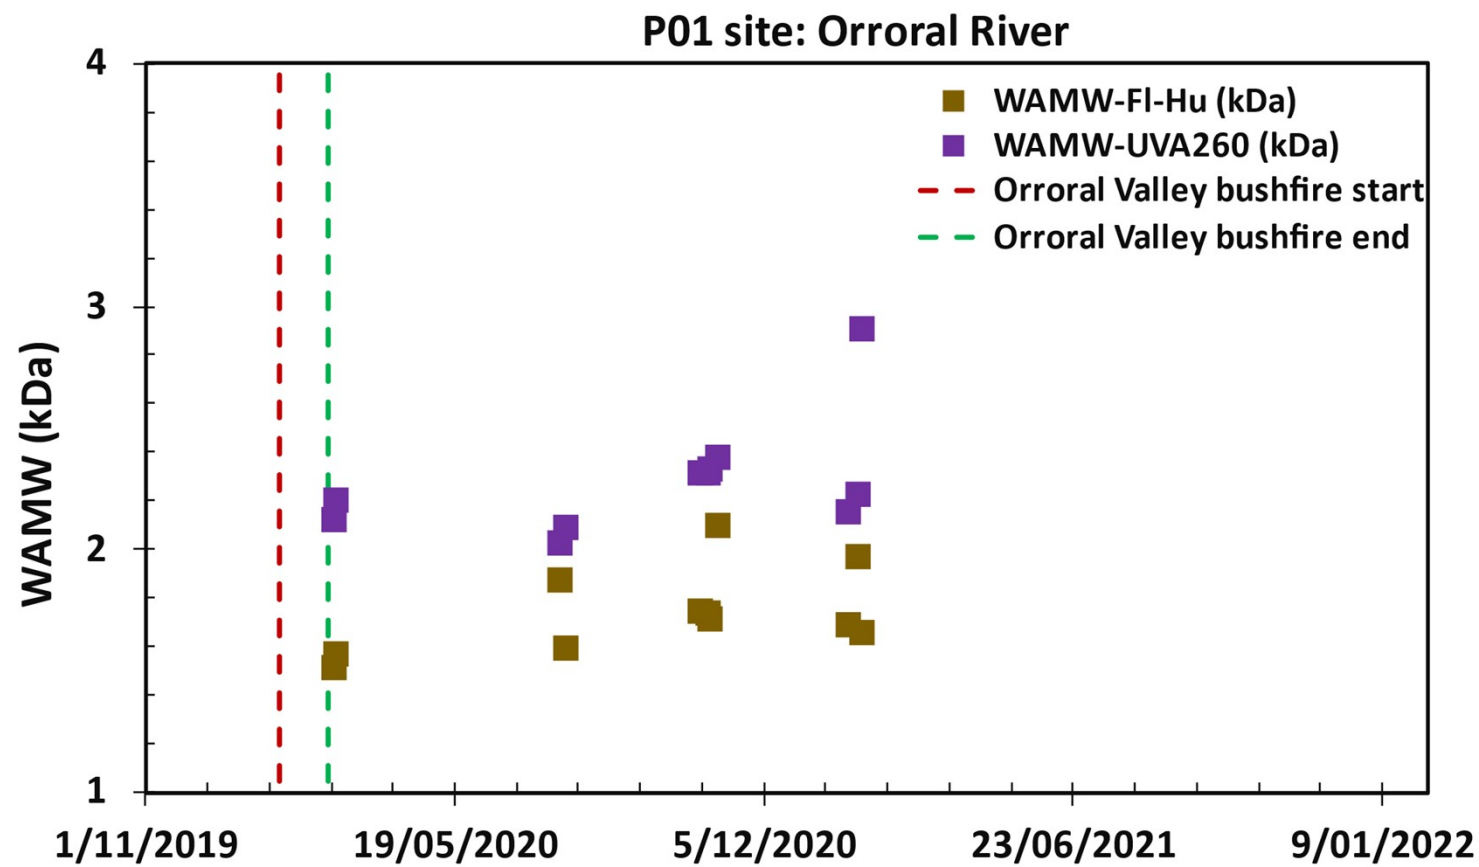

**Figure 7.a2**

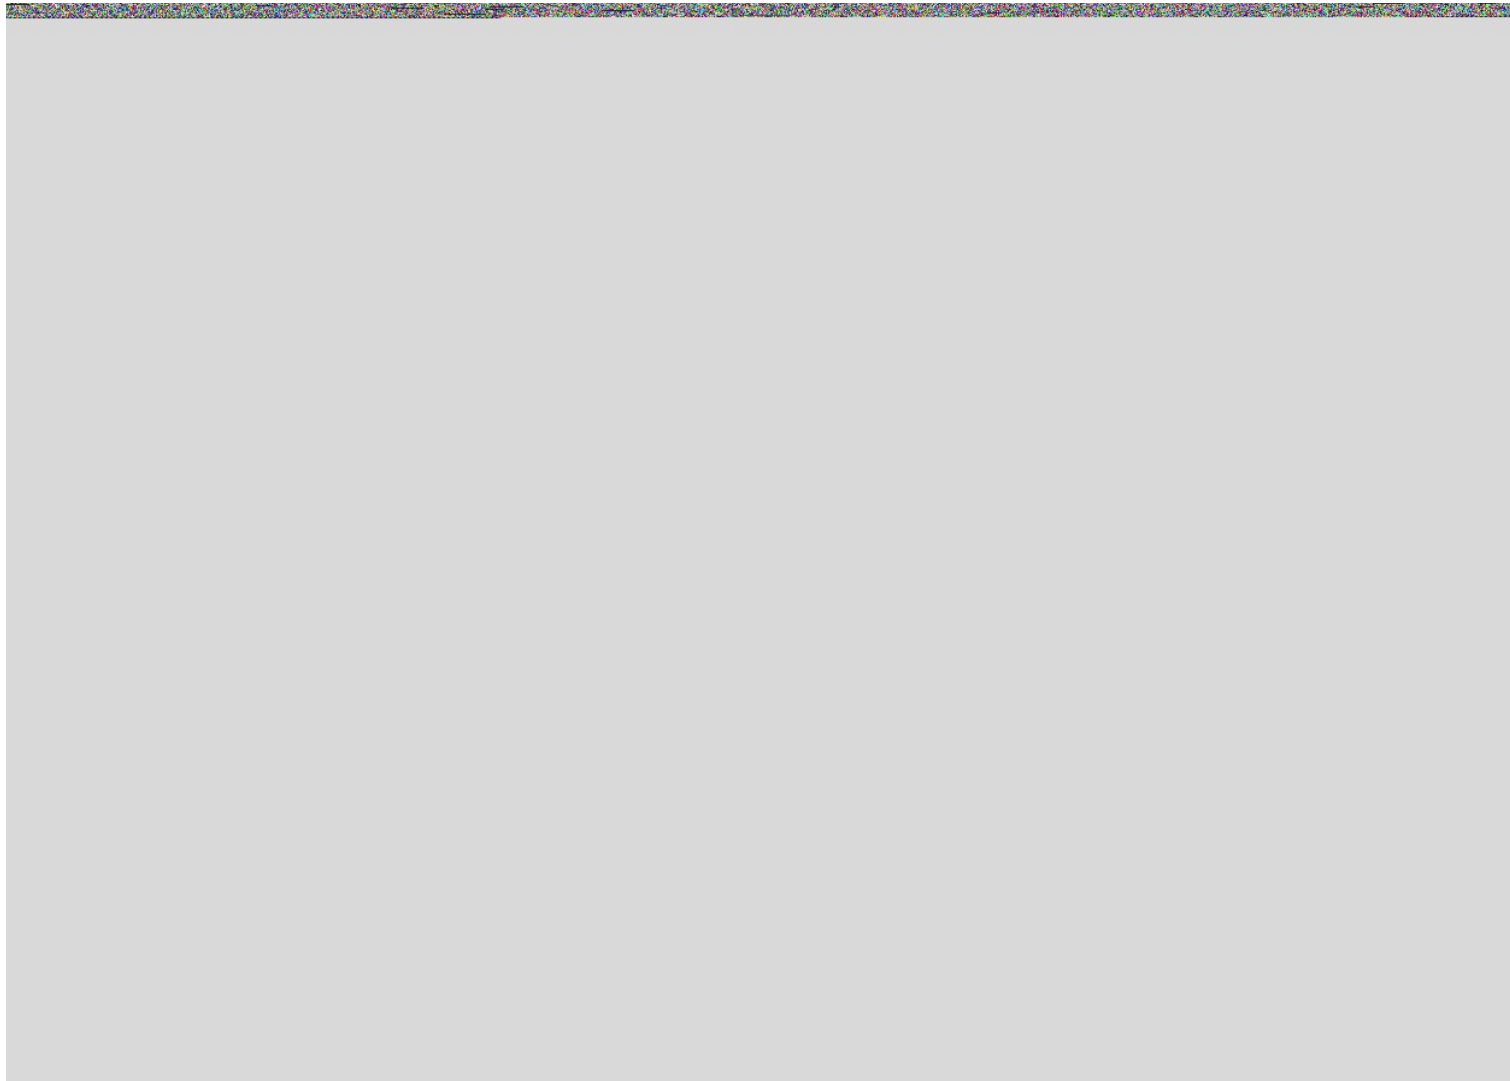

Figure 7.a3

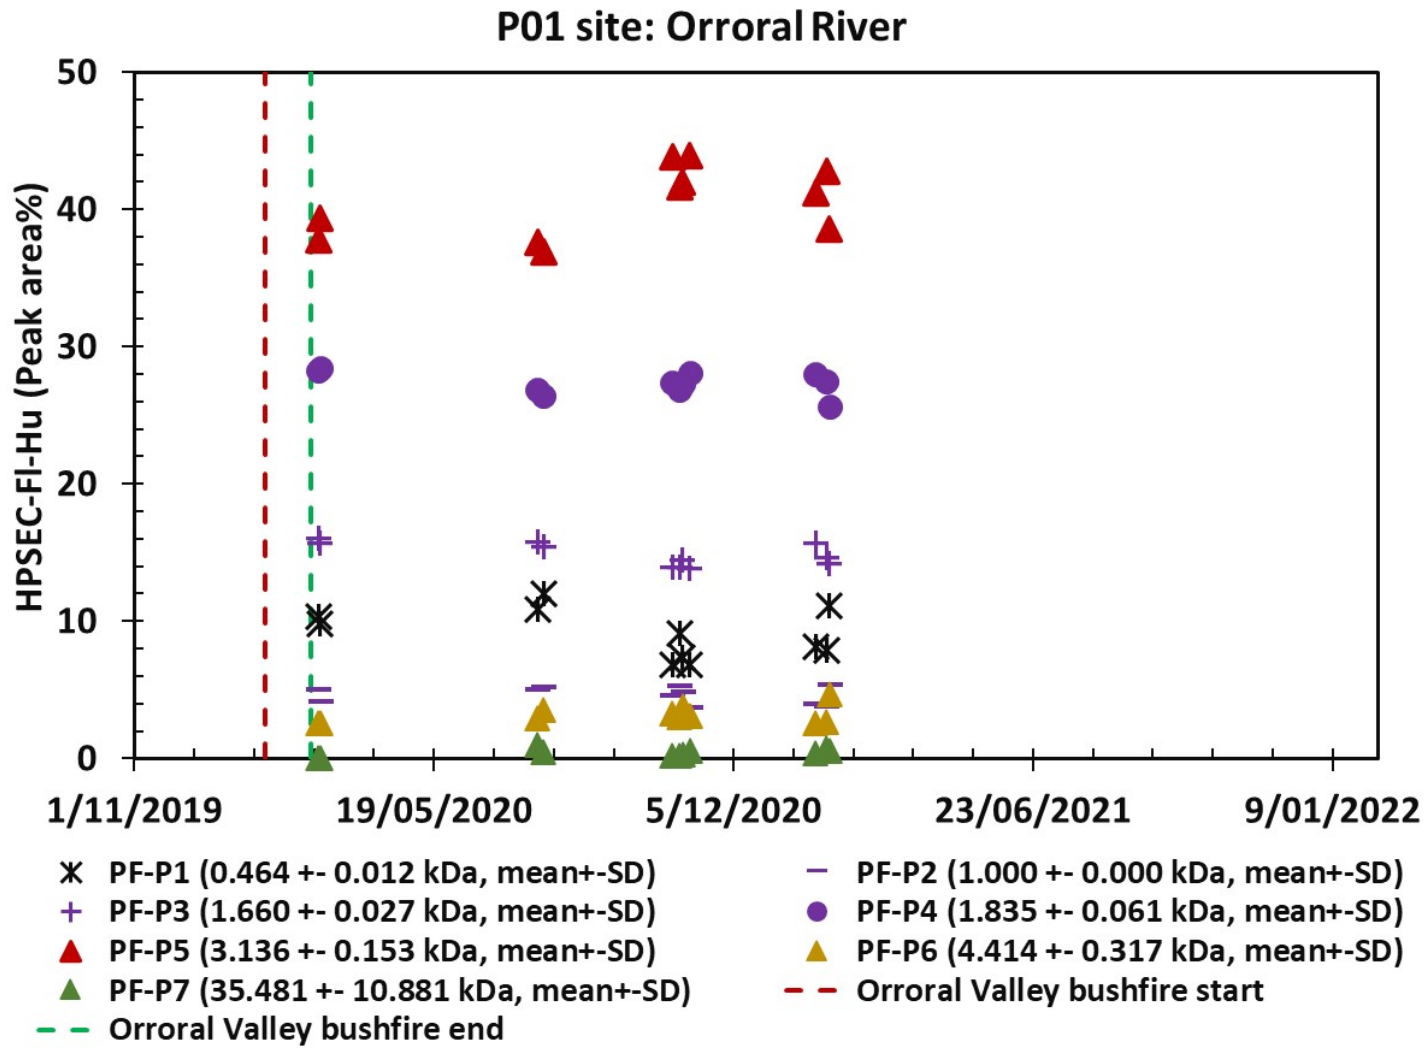



Figure 7.b1

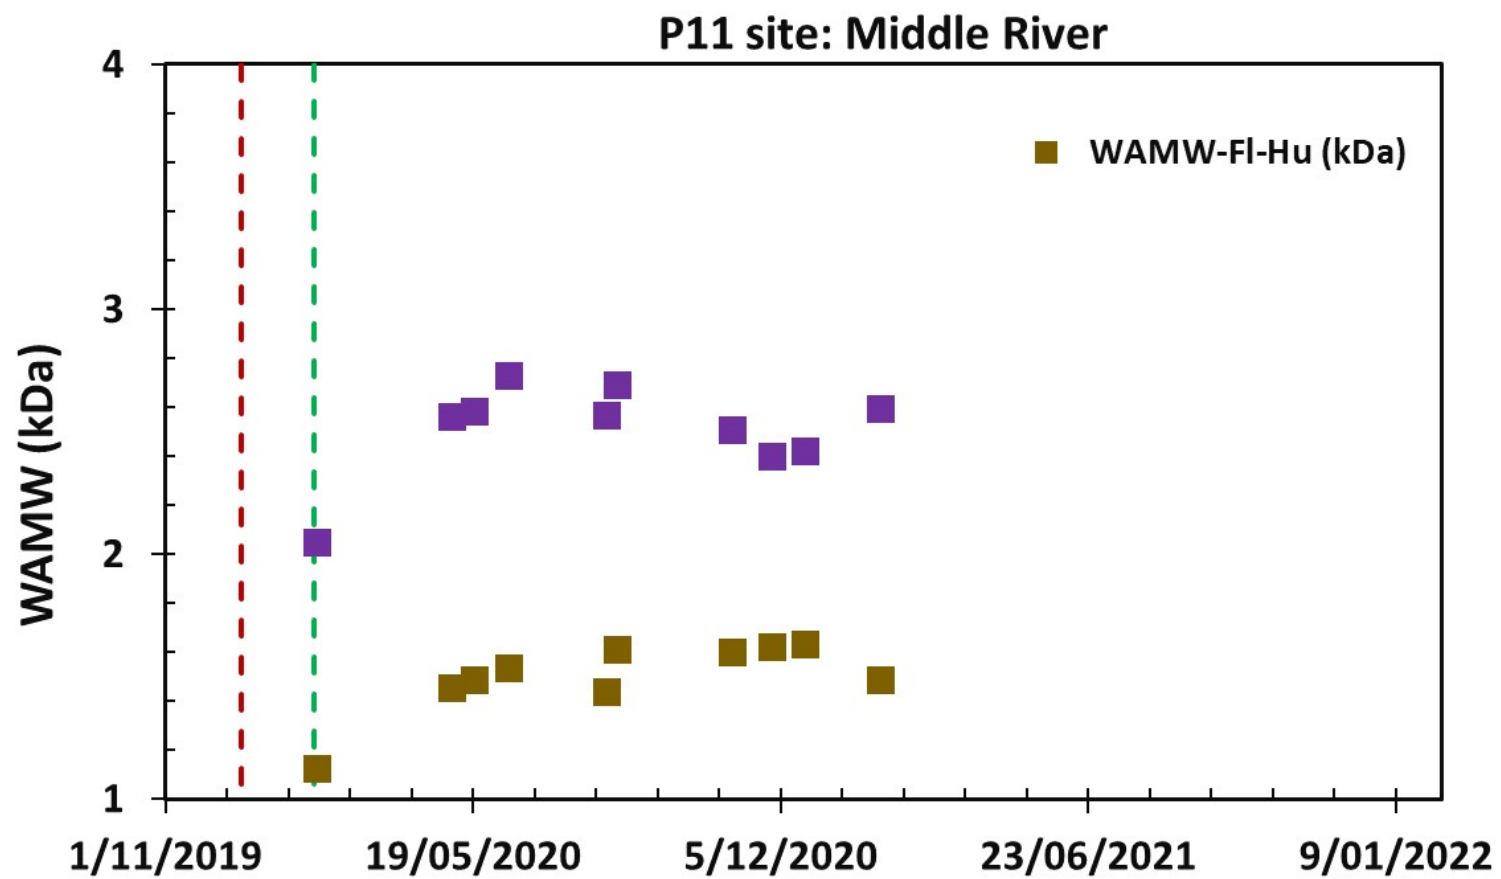

Figure 7.b2

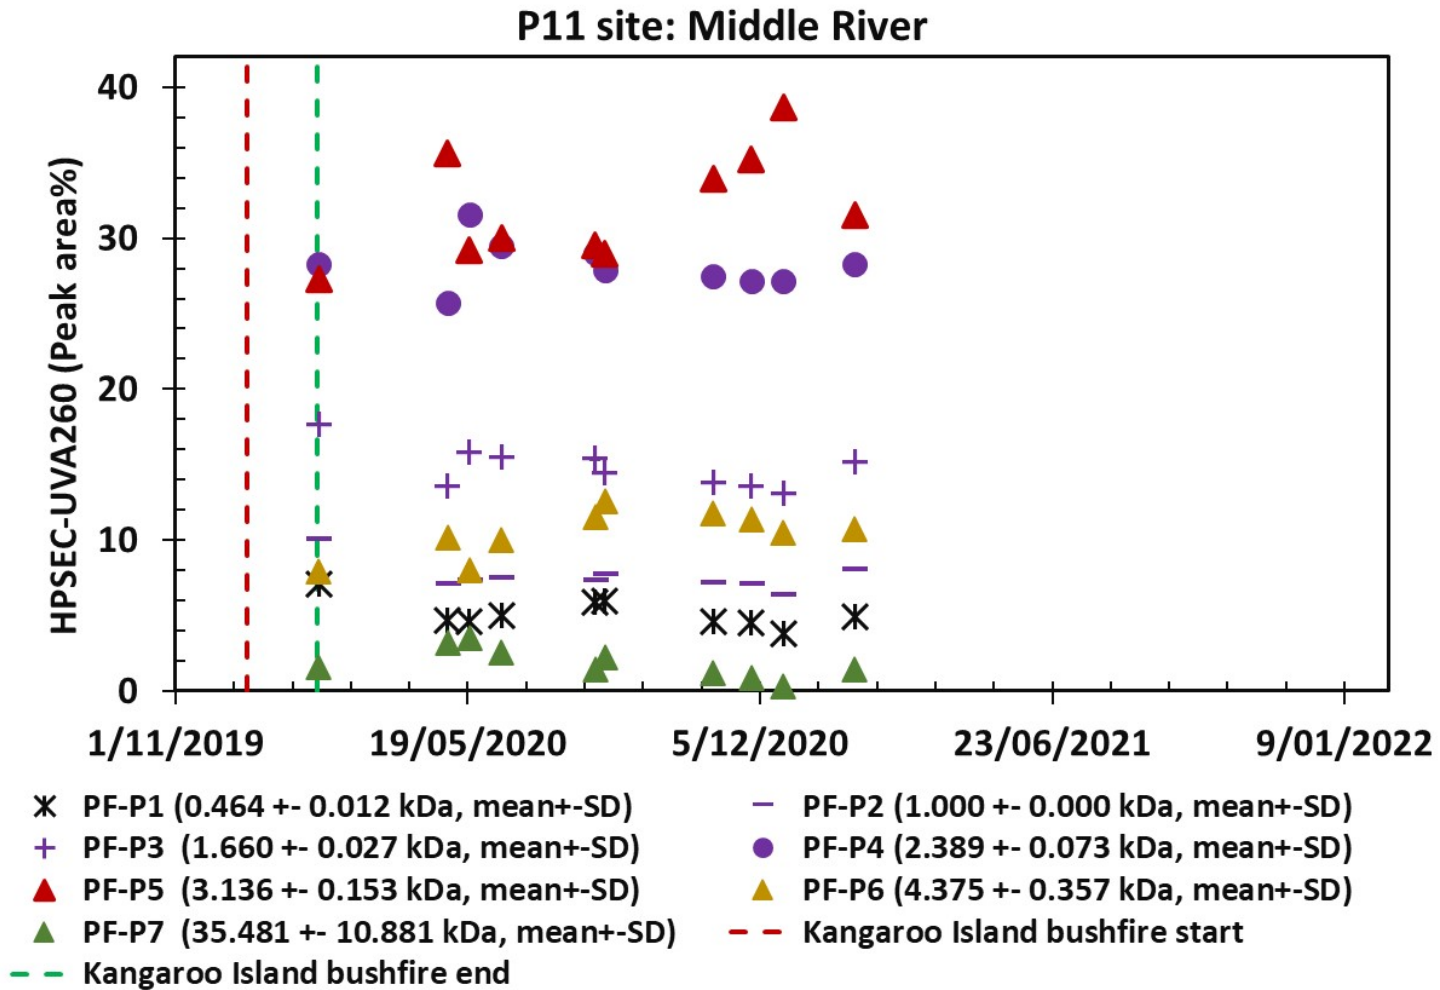

Figure 7.b3

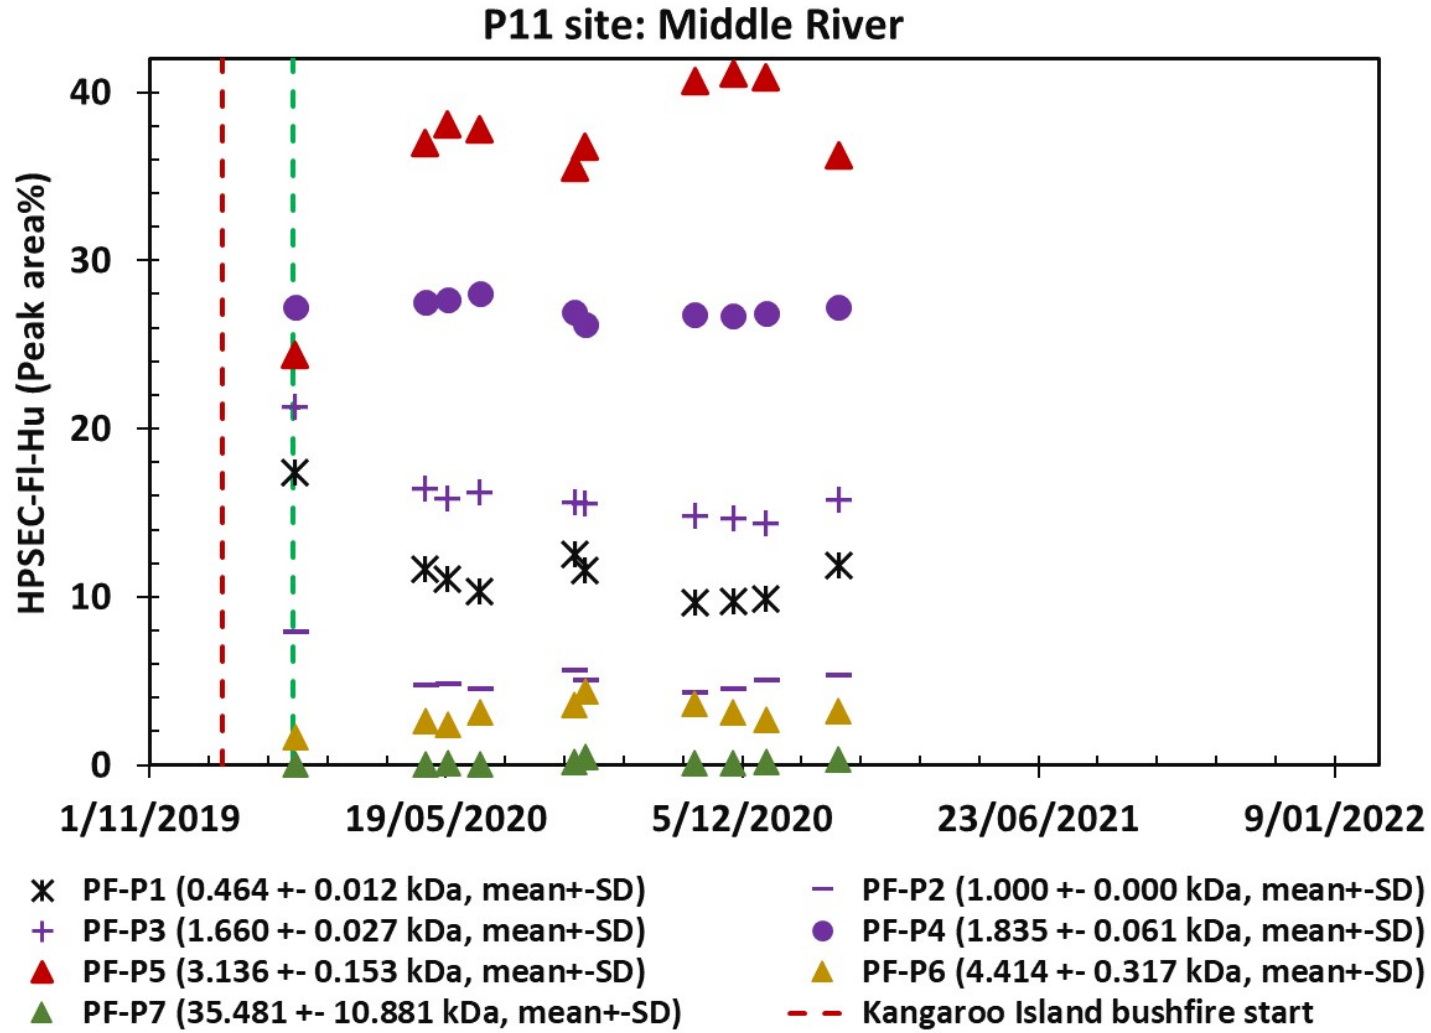

## References

1. T. Ohno, Fluorescence inner-filtering correction for determining the humification index of dissolved organic matter, *Environ Sci Technol*, 2002, **36**, 742-746.
2. A. Huguet, L. Vacher, S. Relexans, S. Saubusse, J. M. Froidefond and E. Parlanti, Properties of fluorescent dissolved organic matter in the Gironde Estuary, *Org Geochem*, 2009, **40**, 706-719.
3. P. G. Coble, in *Subsea Optics and Imaging*, Elsevier, 2013, pp. 98-118.
4. A. M. Hansen, T. E. C. Kraus, B. A. Pellerin, J. A. Fleck, B. D. Downing and B. A. Bergamaschi, Optical properties of dissolved organic matter (DOM): Effects of biological and photolytic degradation, *Limnology and Oceanography*, 2016, **61**, 1015-1032.
5. P. G. Coble, Characterization of marine and terrestrial DOM in seawater using excitation-emission matrix spectroscopy, *Marine Chemistry*, 1996, **51**, 325-346.
6. J. R. Helms, A. Stubbins, E. M. Perdue, N. W. Green, H. Chen and K. Mopper, Photochemical bleaching of oceanic dissolved organic matter and its effect on absorption spectral slope and fluorescence, *Marine Chemistry*, 2013, **155**, 81-91.
